# Supplementary material for: Experience of living with knee osteoarthritis: a systematic review of qualitative studies
Source: PubMed Central journal article supplement — BMJ Open. 2019 Sep 24;9(9):e030060. doi: 10.1136/bmjopen-2019-030060 (PMC6773287; doi:10.1136/bmjopen-2019-030060), 2019-09-24
Supplement: bmjopen-2019-030060.draft_revisions.pdf [file bmjopen-2019-030060.draft_revisions.pdf]

# BMJ Open

BMJ Open is committed to open peer review. As part of this commitment we make the peer review history of every article we publish publicly available.

When an article is published we post the peer reviewers' comments and the authors' responses online. We also post the versions of the paper that were used during peer review. These are the versions that the peer review comments apply to.

The versions of the paper that follow are the versions that were submitted during the peer review process. They are not the versions of record or the final published versions. They should not be cited or distributed as the published version of this manuscript.

BMJ Open is an open access journal and the full, final, typeset and author-corrected version of record of the manuscript is available on our site with no access controls, subscription charges or pay-per-view fees (<http://bmjopen.bmj.com>).

If you have any questions on BMJ Open's open peer review process please email [info.bmjopen@bmj.com](mailto:info.bmjopen@bmj.com)

# BMJ Open

## The experience of living with knee osteoarthritis: A systematic review of qualitative studies

|                               |                                                                                                                                                                                                                                                                                            |
|-------------------------------|--------------------------------------------------------------------------------------------------------------------------------------------------------------------------------------------------------------------------------------------------------------------------------------------|
| Journal:                      | <i>BMJ Open</i>                                                                                                                                                                                                                                                                            |
| Manuscript ID                 | bmjopen-2019-030060                                                                                                                                                                                                                                                                        |
| Article Type:                 | Research                                                                                                                                                                                                                                                                                   |
| Date Submitted by the Author: | 25-Feb-2019                                                                                                                                                                                                                                                                                |
| Complete List of Authors:     | Wallis, Jason ; La Trobe University, Allied Health; Eastern Health, Taylor, Nicholas ; La Trobe University - Bundoora Campus<br>Bunzli, Samantha; University of Melbourne Saint Vincent's Department of Surgery, Depart of Surgery<br>Shields, Nora; La Trobe University - Bundoora Campus |
| Keywords:                     | lived experience, qualitative, systematic review, osteoarthritis, Knee < ORTHOPAEDIC & TRAUMA SURGERY                                                                                                                                                                                      |
|                               |                                                                                                                                                                                                                                                                                            |

SCHOLARONE™  
Manuscripts

1  
2  
3  
4 **The experience of living with knee osteoarthritis: A systematic review of qualitative**  
5 **studies**  
6  
7

8  
9 **Authors**  
10

- 11 1. Jason A Wallis, PhD, School of Allied Health, La Trobe University; Allied Health  
12 Clinical Research Office, Eastern Health, Australia  
13  
14 2. Nicholas F Taylor, PhD, School of Allied Health, La Trobe University; Allied Health  
15 Clinical Research Office, Eastern Health, Australia  
16  
17 3. Samantha Bunzli, PhD, Department of Surgery, The University of Melbourne, St  
18 Vincent's Hospital, Australia  
19  
20 4. Nora Shields, PhD, School of Allied Health, La Trobe University, Australia  
21  
22  
23  
24  
25  
26  
27

28 **Correspondence (for review and publication):**  
29

30  
31 Name: Dr Jason A Wallis  
32

33  
34 Institution: Allied Health Clinical Research Office, Box Hill Hospital, Level 2, 5 Arnold  
35 St, Box Hill, Australia 3128  
36  
37

38  
39 **Tel/Fax:** +61 3 9895 3715 +61 3 9895 4852  
40

41  
42 Email: [jason.wallis@latrobe.edu.au](mailto:jason.wallis@latrobe.edu.au); [Jason.wallis@easternhealth.org.au](mailto:Jason.wallis@easternhealth.org.au);  
43

44  
45 **Running title:** Lived experience of knee osteoarthritis  
46

47  
48 **Key words:** lived experience, qualitative, systematic review, osteoarthritis, knee  
49

50  
51 **Word Count manuscript:** 4000  
52  
53  
54  
55  
56  
57  
58  
59  
60

## Abstract

Objectives: Systematically review the qualitative literature on living with knee osteoarthritis from patient and carer perspectives.

Design: Systematic review of qualitative studies. Five electronic databases (CINAHL, Embase, Medline, Psychinfo, SPORTDiscus) were searched from inception until October 2018. Data were synthesised using thematic and content analysis.

Participants: Studies exploring the experiences of people living with knee osteoarthritis, and their carers were included. Studies exploring experiences of patients having participated in specific interventions, including surgery, or their attitudes about the decision to proceed to knee replacement were excluded.

Results: Twenty-six articles reporting data from 21 studies about the patient (n=665) and carer (n=28) experience of living with knee osteoarthritis were included. Seven themes emerged: (1) Perceived causes of knee osteoarthritis are multifactorial and lead to structural damage to the knee and deterioration over time (n=13 studies); (2) Pain and how to manage it predominates the lived experience (n=19 studies); (3) Knee osteoarthritis impacts activity and participation (n=16 studies); (4) Knee osteoarthritis has a social impact (n=10 studies); (5) Knee osteoarthritis has an emotional impact (n=13 studies); (6) Interactions with health professionals can be positive or negative (n=11 studies); (7) Knee osteoarthritis leads to life adjustments (n=14 studies). A single study reporting the perspectives of carers reported similar themes. Psychosocial impact of knee osteoarthritis emerged as a key factor in the lived experience of people with knee osteoarthritis.

Conclusions: This review highlights the value of considering patient attitudes and experiences including psychosocial factors when planning and implementing management options for people with knee osteoarthritis. Trial registration: PROSPERO registration number CRD42018108962

### Strengths and limitations of this study

- The systematic review was reported consistent with the Enhancing Transparency in Reporting the Synthesis of Qualitative Research (ENTREQ) and registered prospectively with PROSPERO (registration number CRD42018108962).
- A comprehensive search strategy of qualitative studies about patient and carer perceptions about their lived experience with knee osteoarthritis was conducted.
- Comprehensive data synthesis was applied using thematic and content analysis leading to results that went beyond the summary of the selected studies.
- The findings of this review are limited to the experience of living with knee osteoarthritis, and not the experience of receiving specific interventions, including surgery.
- Exclusion of non-English language articles limits the generalizability as other cultures with other languages might have different perceptions of knee osteoarthritis.

## Introduction

The experience of living with chronic pain associated with knee osteoarthritis is multidimensional comprising biological dimensions such as subchondral bone pathology and inflammation(1), and psychological and social dimensions such as pain catastrophizing, depression, avoidance of activities and social support(2-4). The current management of knee osteoarthritis is focussed on pain management to address the biological impairment of joint pathology, through joint-specific exercises, pharmacology and in advanced stages, joint replacement surgery(5, 6). However, levels of pain and disability reported by people with osteoarthritis are poorly correlated with radiographic evidence of disease severity(7). Further, knee replacement surgery, although common, does not always have a successful outcome(1).

The role of psychological and social dimensions in the management of knee osteoarthritis has received relatively little attention, in comparison with management of joint pathology(2).

However, the role of psychological and social factors in chronic musculoskeletal pain conditions other than knee osteoarthritis has been studied extensively(8). In chronic low back pain, for example, psychological and social factors have been shown to play a role in the persistence of pain, and interventions designed to target these factors can improve pain, disability and quality of life in this population(9). Targeting the psychological and social dimensions of knee osteoarthritis in addition to the biological dimensions may optimise outcomes. In order to design targeted interventions, we must first have an understanding of the psychological and social dimensions of knee osteoarthritis from the perspectives of people affected by it.

Qualitative research provides insight into the lived experience of health and how individuals' make sense of their health symptoms. Rather than relying on the a priori assumptions of researchers or clinicians, qualitative research prioritises the voice of the 'expert' participant, thus shedding light on aspects of the lived experience that cannot be reached by quantitative

1  
2  
3 approaches(10). Two recent systematic reviews have synthesised qualitative research related  
4 to knee pain, including people living with osteoarthritis(11, 12). Wride et al(12) explored the  
5 feelings and experiences of people living with knee pain from seven studies, three of which  
6 included people with non-osteoarthritic related knee pain. This review found many people  
7 with knee pain struggle to adapt to normal living, and that their negative experiences were  
8 exacerbated by a lack of knowledge and available information to help them plan for the  
9 future. In another review, Smith et al(11) explored the perceptions of people diagnosed with  
10 hip and/or knee osteoarthritis from 32 studies (18 of which sampled people with knee  
11 osteoarthritis only) to determine their attitudes and perceptions towards living with their  
12 musculoskeletal condition. Participants in these studies reported a number of factors that  
13 contributed to their negative attitude and perception about their hip and/or knee osteoarthritis,  
14 such as their understanding of the pathology of osteoarthritis, the activity limitations they  
15 experienced, and their perceptions of other people's beliefs towards their condition.  
16  
17  
18  
19  
20  
21  
22  
23  
24  
25  
26  
27  
28  
29  
30  
31  
32

33 The two previous systematic reviews synthesising qualitative data have limitations as the they  
34 did not consider the experience of knee osteoarthritis separately to the experience of hip  
35 osteoarthritis (e.g. Smith et al(11)), despite empirical evidence that these are distinct  
36 conditions that impact people in different ways(13). In addition, neither review(11, 12)  
37 looked at the perspectives of carers. Those in the immediate social environment may exert an  
38 influence on how an individual copes with their condition. In the case of knee osteoarthritis,  
39 family members and significant others often adopt the role of carer. By investigating the  
40 perceptions and experiences of both patients and carers, health professionals can gain a  
41 greater understanding of the role of the psychological and social dimensions of the knee  
42 osteoarthritis experience, which may lead to improved management of people with knee  
43 osteoarthritis.  
44  
45  
46  
47  
48  
49  
50  
51  
52  
53  
54  
55  
56  
57  
58  
59  
60

Therefore, the aim of this study was to systematically review the qualitative literature on the experience of living with knee osteoarthritis from the perspectives of patients and carers.

## Methods and analysis

### *Design*

A systematic review of qualitative studies was conducted. The review was reported consistent with the Enhancing Transparency in Reporting the Synthesis of Qualitative Research (ENTREQ),(14). We did not involve patients or public in our work. A review protocol was registered prospectively with PROSPERO registration number CRD42018108962 <https://www.crd.york.ac.uk/PROSPERO>.

### *Search strategy*

Five electronic data bases (CINAHL, Embase, Medline, Psycinfo, SPORTDiscus) were searched from inception until October 2018. The search strategy comprised two key concepts: knee osteoarthritis and qualitative research. For each concept, key words and MeSH terms were combined using the 'OR' operator and the results were combined using the AND operator (Appendix). The search results were downloaded into bibliographic software (Endnote version 18). Two reviewers independently reviewed the titles and abstracts according to the selection criteria (Table 1). If eligibility was uncertain based on title and abstract, the full-text of the study was obtained. Reference lists of included articles were manually searched for additional relevant articles, and citation tracking of included articles was completed using Google Scholar.

### *Eligibility criteria*

Studies reporting the experiences of people living with knee osteoarthritis, and their carers were included. Studies that explored experiences of participation in specific interventions for knee osteoarthritis, including perioperative management and attitudes about the decision to



proceed to total knee replacement were excluded (Table 1). Since the aim of our review was to explore the experience of living with knee osteoarthritis, with a focus on the psychological and social dimensions, it was decided not to include studies that explored perceptions about biological interventions including surgery.

**Table 1:** Selection criteria

|                   | Inclusion criteria                                                                                                                                                                                                                                                            | Exclusion criteria                                                                                                                                                                                                                                                                                 |
|-------------------|-------------------------------------------------------------------------------------------------------------------------------------------------------------------------------------------------------------------------------------------------------------------------------|----------------------------------------------------------------------------------------------------------------------------------------------------------------------------------------------------------------------------------------------------------------------------------------------------|
| Design and report | <ul style="list-style-type: none"> <li>• Qualitative studies</li> <li>• Reports lived experience of knee osteoarthritis</li> <li>• Full text article published in peer-reviewed journal</li> <li>• Primary research</li> </ul>                                                | <ul style="list-style-type: none"> <li>• Questionnaires/surveys</li> <li>• Non-English language</li> <li>• Single case studies</li> <li>• Secondary analysis of qualitative data such as a systematic review</li> </ul>                                                                            |
| Participants      | <ul style="list-style-type: none"> <li>• Knee osteoarthritis</li> <li>• Perceptions of people diagnosed with knee osteoarthritis, and their carers</li> <li>• May include other conditions providing perceptions about knee osteoarthritis are reported separately</li> </ul> | <ul style="list-style-type: none"> <li>• Participants not identified as having knee osteoarthritis (e.g. knee pain, anterior cruciate ligament injury)</li> </ul>                                                                                                                                  |
| Interventions     | <ul style="list-style-type: none"> <li>• No intervention</li> <li>• May include studies exploring perceptions about management, such as knee replacement, provided experiences about living with knee osteoarthritis are reported separately</li> </ul>                       | <ul style="list-style-type: none"> <li>• Explored experiences of patients having participated in interventions</li> <li>• Explored experiences about perioperative management of knee replacement</li> <li>• Explored attitudes about the decision to proceed to total knee replacement</li> </ul> |

## Appendix: Search strategy in Medline

---

### Search

---

1. knee osteoarthritis mp or Osteoarthritis, Knee/
2. knee/
3. Knee joint/
4. (knee adj3 osteoarthritis).mp
5. qualitative research.mp or Qualitative Research/
6. qualitative analysis.mp
7. qualitative evaluation.mp
8. qualitative study.mp
9. 1 or 2 or 3 or 4
10. 5 or 6 or 7 or 8
11. 9 and 10

---

/ denotes MeSH term; mp denotes keyword

### *Data collection process*

Data were extracted from each study on participant age, sex, disease severity and body mass index, where available. Data were also extracted on the study design including sample size, data collection method (e.g. interview or focus group), and qualitative framework informing the analysis.

### *Methodological quality of the included studies*

The Critical Appraisal Skills Programme (CASP) checklist was applied independently by two reviewers to assess methodological quality of the included studies(15). Discrepancies between reviewers were discussed until consensus was reached. The CASP checklist includes 10 questions in 3 sections about the validity of the results (questions 1-6), ethical considerations, trustworthiness and clarity of results (questions 7-9), and the value of the results (question 10). Each question was answered as “yes”, “no” or “can’t tell”, and the checklist provided decision rules and instructions on how to interpret checklist criteria. The CASP checklist has been used in other qualitative systematic reviews in musculoskeletal research(16, 17).

### *Data analysis*

The text used to describe themes and sub-themes in the included articles were assigned descriptive codes using an inductive process. The identified codes were then organised into themes and sub-themes in a process of thematic analysis. Consistent with content analysis methods, the number of studies that identified each theme was counted. This was initially completed by one researcher (NS) after which the identified themes were checked independently by two other researchers (JW, NT).

## Results

### *Study selection*

The search strategy yielded 720 articles. After screening the titles and abstracts of these articles, 42 underwent full text review. Sixteen articles were excluded after full text review resulting in a final library of 26 articles (Figure 1). The most common reasons for exclusion were that articles were abstracts, and the results of knee osteoarthritis were not reported separately from osteoarthritis at other joints. The 26 included articles reported data from 21 studies (Table 2) on the experience of living with knee osteoarthritis from the perspectives of people themselves (n=20) or their carers (n=1).

### *Methodological quality of included studies*

All studies had a clear rationale for using qualitative methods, used appropriate qualitative designs, and included explicit statements of findings that were considered high value. Two studies did not report approval from an ethics committee(18, 19) and four studies reported insufficient details about data analysis reducing the trustworthiness of the results(18-21).

Only two of the 21 studies adequately reported the relationship between the researcher and the participant(22, 23). A pre-existing relationship between the participant and researcher increases the risk of social desirability(24), whereby there is the tendency of the participants to answer questions in a manner that will be viewed favourably by the researchers (Table 3).

### *Study participant characteristics*

The 21 studies included 665 people with knee osteoarthritis (71% women; mean age 65 years, age range 25 to 87) and 28 carers of people with knee osteoarthritis (46% women; mean age 48 years) (Table 2). The studies were conducted in Asia (n=6), North America (n=6), Europe (n=8) and New Zealand (n=1) and 15 of the 21 studies were published since 2011. Participants' comorbidities as described in 6 studies included diabetes,

1  
2  
3 depression/anxiety, polyarthritis, hypertension, heart disease, haemophilia, silicosis, vascular  
4 problems, cancer, gout, osteoarthritis in other joints and multiple knee surgeries. Participants  
5  
6 in 9 studies self-assessed their pain severity at the time of their participation as mild to  
7  
8 severe(19, 21, 25-31), and participants in 4 studies had severe osteoarthritis and were  
9  
10 awaiting total knee replacement(23, 32-34). Thirteen studies provided details on participant  
11  
12 employment status; the majority of participants were retired or not working, except for 3  
13  
14 studies(22, 29, 35) in which the majority of participants were employed at the time of the  
15  
16 study.  
17  
18  
19  
20  
21  
22  
23  
24  
25  
26  
27  
28  
29  
30  
31  
32  
33  
34  
35  
36  
37  
38  
39  
40  
41  
42  
43  
44  
45  
46  
47  
48  
49  
50  
51  
52  
53  
54  
55  
56  
57  
58  
59  
60

**Table 2:** Characteristics of included studies of experiences of living with knee osteoarthritis

| Study                                                     | Country   | Population                                                                         | Demographics<br>(N, age, sex, BMI)    | Method:<br>Framework/analysis                                      | Sampling    | Data collection                           | Research questions                                                                                                                                                                                       |
|-----------------------------------------------------------|-----------|------------------------------------------------------------------------------------|---------------------------------------|--------------------------------------------------------------------|-------------|-------------------------------------------|----------------------------------------------------------------------------------------------------------------------------------------------------------------------------------------------------------|
| Alami <i>et al.</i> , 2011                                | France    | Knee osteoarthritis                                                                | N=81<br>71% women,                    | Descriptive<br>-Inductive                                          | Purposive   | Individual interviews<br>-semi-structured | Explore views of patients about management of knee osteoarthritis                                                                                                                                        |
| Ahmad <i>et al.</i> , 2018                                | Malaysia  | Knee osteoarthritis                                                                | N=12<br>Mean age 67 yrs<br>67% women  | Thematic analysis                                                  | Purposive   | Individual interviews<br>-in-depth        | Explore perspectives of patients with knee OA mainly about pain experiences, its impact, effects of physiotherapy and their personal expectation                                                         |
| Al-Ta'iar <i>et al.</i> , 2013                            | Kuwait    | Severe knee osteoarthritis<br>-Kuwaiti women waitlisted for total knee replacement | N=39<br>Mean age 62 yrs<br>100% women | Thematic analysis                                                  | Convenience | Focus groups                              | Explore the pain experience and mobility limitation as well as the patient's decision making process to undertake total knee replacement among women with knee pain in the waiting list for surgery      |
| Carmona-Teres <i>et al.</i> , 2017                        | Spain     | Knee osteoarthritis<br>-symptomatic                                                | N=10<br>Mean age 70 yrs,<br>70% women | Content thematic analysis based on Lazarus stress model categories | Theoretical | Individual interviews<br>-semi-structured | Understand experiences, perceptions, cognitive evaluation, values, emotions, beliefs and coping strategies of people with knee osteoarthritis                                                            |
| Chan and Chan, 2011                                       | Hong Kong | Knee osteoarthritis<br>-mild to very severe                                        | N=20<br>Mean age 57 yrs,<br>65% women | Grounded theory                                                    | Convenience | Individual interviews<br>-semi-structured | Evaluate influence of different pain patterns on quality of life Investigate coping strategies                                                                                                           |
| Clarke <i>et al.</i> , 2014<br>Pouli <i>et al.</i> , 2014 | UK        | Knee osteoarthritis<br>-symptomatic                                                | N=24<br>Mean age 62 yrs,<br>71% women | Descriptive thematic analysis                                      | Purposive   | Individual interviews<br>-semi-structured | Explore participant's experience of living with knee osteoarthritis and their beliefs about knee osteoarthritis and its treatment                                                                        |
| Darlow <i>et al.</i> , 2018                               | NZ        | Knee osteoarthritis                                                                | N=13<br>Age range 50-84<br>54% women  | Interpretative description                                         | Purposive   | Individual interviews<br>-semi-structured | Explore the beliefs of people with knee osteoarthritis about the disease, how these beliefs had formed and what impact these beliefs had on activity participation, health behaviour and self-management |

1  
2  
3  
4  
5  
6  
7  
8  
9  
10  
11  
12  
13  
14  
15  
16  
17  
18  
19  
20  
21  
22  
23  
24  
25  
26  
27  
28  
29  
30  
31  
32  
33  
34  
35  
36  
37  
38  
39  
40  
41  
42  
43  
44  
45  
46

|                                           |        |                                                                         |                                          |                                                             |                                                                                  |                                                                                |                                                                                                                                                                                                    |
|-------------------------------------------|--------|-------------------------------------------------------------------------|------------------------------------------|-------------------------------------------------------------|----------------------------------------------------------------------------------|--------------------------------------------------------------------------------|----------------------------------------------------------------------------------------------------------------------------------------------------------------------------------------------------|
| Figaro <i>et al.</i> , 2004               | US     | Knee osteoarthritis<br>-not actively seeking total knee replacement     | N=94<br>Mean age 71 yrs<br>84% women     | Content analysis<br><br>Constant comparative methods        | Purposive<br><br>Network, convenience and snowball sampling to extend the sample | Structured field interviews                                                    | Explore older urban Blacks with knee osteoarthritis to determine their preferences and expectations of total knee replacement                                                                      |
| Hall <i>et al.</i> , 2008                 | Canada | Unilateral knee osteoarthritis<br>-scheduled for total knee replacement | N=15<br>Mean age 67 yrs<br>40% women     | Grounded theory                                             | Purposive                                                                        | Individual interviews<br>-semi-structured                                      | Explore views of total knee replacement and the role of physiotherapy                                                                                                                              |
| Hendry <i>et al.</i> , 2006               | UK     | Knee osteoarthritis<br>-mild to severe symptoms                         | N=22<br>Age range 52-86 yrs<br>73% women | Conceptual Framework                                        | Convenience                                                                      | Individual interviews<br>Focus Groups (N=6)                                    | Explore the views of primary care patients with knee osteoarthritis towards exercise, and explore factors that determine acceptability and motivation to exercise, and barriers that limit its use |
| Hsu <i>et al.</i> , 2015                  | Taiwan | Family carers of people with knee osteoarthritis                        | N=28<br>Mean age 48 yrs,<br>46% women    | Descriptive content analysis                                | Convenience                                                                      | Individual interviews<br>-semi-structured                                      | Explore primary caregivers' perceptions of their older relatives' knee osteoarthritis pain and management                                                                                          |
| Keysor <i>et al.</i> , 1998               | USA    | Knee osteoarthritis<br>-presence of functional limitations              | N=4<br>Age range 25-43 yrs,<br>75% women | Van Kaam method of phenomenologic data analysis             | Purposive                                                                        | Individual interviews<br>-semi structured (each participant interviewed twice) | Understand the experience of living with osteoarthritis as young and middle-aged adults                                                                                                            |
| Kao and Tsai, 2012, 2013                  | Taiwan | Knee osteoarthritis<br>-symptomatic                                     | N=17<br>Mean age 50 yrs,<br>82% women    | Constant comparison                                         | Purposive                                                                        | Individual interviews<br>-semi structured                                      | Understand the living and illness experiences of middle-aged adults with early knee osteoarthritis                                                                                                 |
| MacKay <i>et al.</i> , 2016, 2014a, 2014b | Canada | Knee osteoarthritis<br>-moderately symptomatic                          | N=51<br>Median age 49 yrs,<br>61% women  | Constructivist grounded Theory/ constant comparative method | Purposive                                                                        | Focus groups<br>Individual interviews<br>-semi-structured                      | Explore the meaning and perceived consequences of knee symptoms                                                                                                                                    |

|    |                                                      |           |                     |                                            |                                      |             |                                                      |                                                                                                                                                                                   |
|----|------------------------------------------------------|-----------|---------------------|--------------------------------------------|--------------------------------------|-------------|------------------------------------------------------|-----------------------------------------------------------------------------------------------------------------------------------------------------------------------------------|
| 1  |                                                      |           |                     |                                            |                                      |             |                                                      |                                                                                                                                                                                   |
| 2  |                                                      |           |                     |                                            |                                      |             |                                                      |                                                                                                                                                                                   |
| 3  |                                                      |           |                     |                                            |                                      |             |                                                      |                                                                                                                                                                                   |
| 4  | Maly and Krupa, 2007                                 | Canada    | Knee osteoarthritis | N=3<br>Age range 62-87 yrs,<br>67% women   | Descriptive<br>phenomenology         | Convenience | Individual interviews<br>-semi structured            | Understand the experience of living with<br>knee osteoarthritis in older adults                                                                                                   |
| 5  |                                                      |           |                     |                                            |                                      |             |                                                      |                                                                                                                                                                                   |
| 6  |                                                      |           |                     |                                            |                                      |             |                                                      |                                                                                                                                                                                   |
| 7  |                                                      |           |                     |                                            |                                      |             |                                                      |                                                                                                                                                                                   |
| 8  | Man <i>et al.</i> , 2017                             | US        | Knee osteoarthritis | N=8<br>Age range 46-80 yrs<br>50% women    | Thematic analysis                    | Purposive   | Individual interviews<br>-semi-structured            | Explore the meaning and importance of<br>occupational changes experienced by<br>individuals during the pre- total knee<br>replacement period                                      |
| 9  |                                                      |           |                     |                                            |                                      |             |                                                      |                                                                                                                                                                                   |
| 10 |                                                      |           |                     |                                            |                                      |             |                                                      |                                                                                                                                                                                   |
| 11 |                                                      |           |                     |                                            |                                      |             |                                                      |                                                                                                                                                                                   |
| 12 | Morden <i>et al.</i> 2011,<br>Ong <i>et al.</i> 2011 | UK        | Knee osteoarthritis | N=22<br>Age range 50-75+ yrs,<br>59% women | Constant comparison                  | Purposive   | Individual interviews<br>-in-depth<br>Diaries        | Explore the meaning and enactment of<br>self-management in everyday life                                                                                                          |
| 13 |                                                      |           |                     |                                            |                                      |             |                                                      |                                                                                                                                                                                   |
| 14 |                                                      |           |                     |                                            |                                      |             |                                                      |                                                                                                                                                                                   |
| 15 |                                                      |           |                     |                                            |                                      |             |                                                      |                                                                                                                                                                                   |
| 16 |                                                      |           |                     |                                            |                                      |             |                                                      |                                                                                                                                                                                   |
| 17 | Nyvang <i>et al.</i> , 2016                          | Sweden    | Knee osteoarthritis | N=12<br>Mean age 66 yrs<br>58% women       | Thematic analysis                    | Purposive   | Individual interviews<br>-semi-structured            | Explore patients' experiences of living<br>with knee osteoarthritis when scheduled<br>for total knee replacement and further their<br>expectations for future life after surgery. |
| 18 |                                                      |           |                     |                                            |                                      |             |                                                      |                                                                                                                                                                                   |
| 19 |                                                      |           |                     |                                            |                                      |             |                                                      |                                                                                                                                                                                   |
| 20 |                                                      |           |                     |                                            |                                      |             |                                                      |                                                                                                                                                                                   |
| 21 | Tallon <i>et al.</i> , 2000                          | UK        | Knee osteoarthritis | N=7<br>-mild to moderate                   | Content analysis                     | Convenience | Focus group                                          | Explore perception of treatment<br>preferences                                                                                                                                    |
| 22 |                                                      |           |                     |                                            |                                      |             |                                                      |                                                                                                                                                                                   |
| 23 |                                                      |           |                     |                                            |                                      |             |                                                      |                                                                                                                                                                                   |
| 24 | Victor <i>et al.</i> , 2004                          | UK        | Knee osteoarthritis | N=170<br>Mean age 63 yrs,<br>73% women     | Content analysis                     | Convenience | Individual interviews<br>Group discussion<br>Diaries | Explore meaning of osteoarthritis for those<br>receiving health promotion                                                                                                         |
| 25 |                                                      |           |                     |                                            |                                      |             |                                                      |                                                                                                                                                                                   |
| 26 |                                                      |           |                     |                                            |                                      |             |                                                      |                                                                                                                                                                                   |
| 27 |                                                      |           |                     |                                            |                                      |             |                                                      |                                                                                                                                                                                   |
| 28 |                                                      |           |                     |                                            |                                      |             |                                                      |                                                                                                                                                                                   |
| 29 | Xie <i>et al.</i> , 2006                             | Singapore | Knee osteoarthritis | N=41<br>Mean age 64 yrs,<br>66% women      | Grounded theory/<br>Content analysis | Purposive   | Focus groups                                         | Determine health-related quality of life<br>domains affected by knee osteoarthritis.<br>and identify ethnic variations in the<br>importance of these domains                      |
| 30 |                                                      |           |                     |                                            |                                      |             |                                                      |                                                                                                                                                                                   |
| 31 |                                                      |           |                     |                                            |                                      |             |                                                      |                                                                                                                                                                                   |
| 32 |                                                      |           |                     |                                            |                                      |             |                                                      |                                                                                                                                                                                   |
| 33 | Yrs = Years                                          |           |                     |                                            |                                      |             |                                                      |                                                                                                                                                                                   |
| 34 |                                                      |           |                     |                                            |                                      |             |                                                      |                                                                                                                                                                                   |
| 35 |                                                      |           |                     |                                            |                                      |             |                                                      |                                                                                                                                                                                   |
| 36 |                                                      |           |                     |                                            |                                      |             |                                                      |                                                                                                                                                                                   |
| 37 |                                                      |           |                     |                                            |                                      |             |                                                      |                                                                                                                                                                                   |
| 38 |                                                      |           |                     |                                            |                                      |             |                                                      |                                                                                                                                                                                   |
| 39 |                                                      |           |                     |                                            |                                      |             |                                                      |                                                                                                                                                                                   |
| 40 |                                                      |           |                     |                                            |                                      |             |                                                      |                                                                                                                                                                                   |
| 41 |                                                      |           |                     |                                            |                                      |             |                                                      |                                                                                                                                                                                   |
| 42 |                                                      |           |                     |                                            |                                      |             |                                                      |                                                                                                                                                                                   |
| 43 |                                                      |           |                     |                                            |                                      |             |                                                      |                                                                                                                                                                                   |
| 44 |                                                      |           |                     |                                            |                                      |             |                                                      |                                                                                                                                                                                   |
| 45 |                                                      |           |                     |                                            |                                      |             |                                                      |                                                                                                                                                                                   |
| 46 |                                                      |           |                     |                                            |                                      |             |                                                      |                                                                                                                                                                                   |



**Table 3:** Critical Appraisal Skills Programme (CASP) assessment

| Study name                                                 | 1. Was there a clear statement of the aims of the research? | 2. Is a qualitative methodology appropriate? | 3. Was the research design appropriate to address the aims of the research? | 4. Was the recruitment strategy appropriate to the aims of the research? | 5. Was the data collected in a way that addressed the research issue? | 6. Has the relationship between researcher and participant been adequately considered? | 7. Have ethical issues been taken into consideration? | 8. Was the data analysis sufficiently rigorous? | 9. Is there a clear statement of findings? | 10. How valuable is the research? |
|------------------------------------------------------------|-------------------------------------------------------------|----------------------------------------------|-----------------------------------------------------------------------------|--------------------------------------------------------------------------|-----------------------------------------------------------------------|----------------------------------------------------------------------------------------|-------------------------------------------------------|-------------------------------------------------|--------------------------------------------|-----------------------------------|
| Alami <i>et al.</i> , 2011                                 | Y                                                           | Y                                            | Y                                                                           | Y                                                                        | N                                                                     | N                                                                                      | Y                                                     | Y                                               | Y                                          | Y                                 |
| Ahmed <i>et al.</i> , 2018                                 | Y                                                           | Y                                            | Y                                                                           | Y                                                                        | Y                                                                     | N                                                                                      | Y                                                     | N                                               | Y                                          | Y                                 |
| Al-Taiar <i>et al.</i> , 2013                              | Y                                                           | Y                                            | Y                                                                           | Y                                                                        | Y                                                                     | N                                                                                      | Y                                                     | Y                                               | Y                                          | Y                                 |
| Carmona-Teres <i>et al.</i> , 2017                         | Y                                                           | Y                                            | Y                                                                           | Y                                                                        | Y                                                                     | N                                                                                      | Y                                                     | Y                                               | Y                                          | Y                                 |
| Chan and Chan., 2011                                       | Y                                                           | Y                                            | Y                                                                           | Y                                                                        | Y                                                                     | N                                                                                      | Y                                                     | N                                               | Y                                          | Y                                 |
| Clarke <i>et al.</i> , 2014 and Pouli <i>et al.</i> , 2014 | Y                                                           | Y                                            | Y                                                                           | Y                                                                        | Y                                                                     | N                                                                                      | Y                                                     | Y                                               | Y                                          | Y                                 |
| Darlow <i>et al.</i> , 2018                                | Y                                                           | Y                                            | Y                                                                           | Y                                                                        | Y                                                                     | Y                                                                                      | Y                                                     | Y                                               | Y                                          | Y                                 |
| Figaro <i>et al.</i> , 2004                                | Y                                                           | Y                                            | Y                                                                           | Y                                                                        | Y                                                                     | N                                                                                      | Y                                                     | Y                                               | Y                                          | Y                                 |
| Hall <i>et al.</i> , 2008                                  | Y                                                           | Y                                            | Y                                                                           | Y                                                                        | Y                                                                     | Y                                                                                      | Y                                                     | Y                                               | Y                                          | Y                                 |

|    |                                          |   |   |   |   |   |   |   |   |   |   |
|----|------------------------------------------|---|---|---|---|---|---|---|---|---|---|
| 1  |                                          |   |   |   |   |   |   |   |   |   |   |
| 2  |                                          |   |   |   |   |   |   |   |   |   |   |
| 3  |                                          |   |   |   |   |   |   |   |   |   |   |
| 4  | Hendry <i>et al.</i> , 2006              | Y | Y | Y | Y | Y | N | Y | Y | Y | Y |
| 5  |                                          |   |   |   |   |   |   |   |   |   |   |
| 6  | Hsu <i>et al.</i> , 2015                 | Y | Y | Y | Y | Y | N | Y | Y | Y | Y |
| 7  |                                          |   |   |   |   |   |   |   |   |   |   |
| 8  | Kao <i>et al.</i> , 2012, 2014           | Y | Y | Y | Y | Y | N | Y | Y | Y | Y |
| 9  |                                          |   |   |   |   |   |   |   |   |   |   |
| 10 |                                          |   |   |   |   |   |   |   |   |   |   |
| 11 | Keysor <i>et al.</i> , 1998              | Y | Y | Y | Y | Y | N | Y | Y | Y | Y |
| 12 |                                          |   |   |   |   |   |   |   |   |   |   |
| 13 | Mackay <i>et al.</i> , 2016, 2014a.      | Y | Y | Y | Y | Y | N | Y | Y | Y | Y |
| 14 |                                          |   |   |   |   |   |   |   |   |   |   |
| 15 | 2014b                                    |   |   |   |   |   |   |   |   |   |   |
| 16 |                                          |   |   |   |   |   |   |   |   |   |   |
| 17 |                                          |   |   |   |   |   |   |   |   |   |   |
| 18 | Maly and Krupa, 2007                     | Y | Y | Y | Y | Y | N | Y | Y | Y | Y |
| 19 |                                          |   |   |   |   |   |   |   |   |   |   |
| 20 | Man <i>et al.</i> , 2017                 | Y | Y | Y | Y | Y | N | Y | Y | Y | Y |
| 21 |                                          |   |   |   |   |   |   |   |   |   |   |
| 22 |                                          |   |   |   |   |   |   |   |   |   |   |
| 23 | Morden <i>et al.</i> 2011, Ong <i>et</i> | Y | Y | Y | Y | Y | N | Y | Y | Y | Y |
| 24 | <i>al.</i> 2011                          |   |   |   |   |   |   |   |   |   |   |
| 25 |                                          |   |   |   |   |   |   |   |   |   |   |
| 26 |                                          |   |   |   |   |   |   |   |   |   |   |
| 27 | Nyvang <i>et al.</i> 2016                | Y | Y | Y | Y | Y | N | Y | Y | Y | Y |
| 28 |                                          |   |   |   |   |   |   |   |   |   |   |
| 29 | Tallon <i>et al.</i> 2000                | Y | Y | Y | N | Y | N | N | Y | Y | Y |
| 30 |                                          |   |   |   |   |   |   |   |   |   |   |
| 31 |                                          |   |   |   |   |   |   |   |   |   |   |
| 32 | Victor <i>et al.</i> 2004                | Y | Y | Y | Y | Y | N | N | N | Y | Y |
| 33 |                                          |   |   |   |   |   |   |   |   |   |   |
| 34 | Xie <i>et al.</i> 2006                   | Y | Y | Y | Y | Y | N | Y | Y | Y | Y |
| 35 |                                          |   |   |   |   |   |   |   |   |   |   |
| 36 |                                          |   |   |   |   |   |   |   |   |   |   |

---

Y = yes, N = no

1  
2  
3 *Major themes reported by included studies*  
4  
5

6 Seven major themes emerged from the data: (1) The perceived causes of knee osteoarthritis  
7 are multifactorial and lead to structural damage to the knee and deterioration over time; (2)  
8 Pain and how to manage it predominates the lived experience; (3) Knee osteoarthritis impacts  
9 activity and participation; (4) Knee osteoarthritis has a social impact; (5) Knee osteoarthritis  
10 has an emotional impact; (6) Interactions with health professionals can be positive or  
11 negative; and (7) Knee osteoarthritis leads to life adjustments.  
12  
13  
14  
15  
16  
17  
18  
19

20 *(1) The perceived causes of knee osteoarthritis are multifactorial and lead to structural*  
21 *damage to the knee and deterioration over time*  
22  
23  
24

25 Thirteen studies reported what participants perceived the causes of knee osteoarthritis  
26 were(18-22, 26-29, 31, 32, 36, 37). Perceived cause of knee osteoarthritis included internal  
27 factors (such as being overweight, family history of osteoarthritis, ageing, working in  
28 occupations requiring heavy manual work such as extensive kneeling or lifting, past sporting  
29 activities, and menopause); and external factors (such as trauma and the weather).  
30 Participants perceived knee osteoarthritis as preventable or partially attributable to actions or  
31 incidents that were modifiable (e.g. pushing too far or knee injury) had they changed their  
32 behaviour earlier in life. Participants in 4 studies expressed strong beliefs and concerns about  
33 their knee osteoarthritis being caused by structural deterioration(19, 22, 27, 28) using  
34 language such as ‘bone on bone’ with the joint worn away by movement. Carers of people  
35 with knee osteoarthritis attributed the cause of their relative’s knee osteoarthritis to ageing,  
36 working too hard or to unknown causes (36).  
37  
38  
39  
40  
41  
42  
43  
44  
45  
46  
47  
48  
49  
50  
51  
52

53 The prognosis of knee osteoarthritis was discussed by participants in 6 studies(20, 22, 26-29).  
54 Participants believed their symptoms would get worse over time as knee osteoarthritis was ‘a  
55 progressive degenerative disease’ and could not be ‘cured’. However, participants in one  
56  
57  
58  
59  
60

1  
2  
3 study(29) also felt they could halt or slow the progression of their symptoms through diet and  
4  
5 exercise.  
6  
7

8  
9 *(2) Pain and how to manage it predominates the lived experience*

10  
11 The participants' experience of pain and its management emerged as a theme in 19  
12 studies(19-23, 25-27, 29-39). Pain was described by participants as the predominant  
13  
14 'omnipresent' feature of knee osteoarthritis. Pain was perceived to interrupt and deter daily  
15  
16 activities such as walking, to make people less confident in their bodies, and to slow people  
17  
18 down. Participants in one study described two distinct patterns of pain: 'mechanical' pain  
19  
20 described as 'sharp' pain related to discrete movements or activities, and 'inflammatory' pain  
21  
22 described as a 'burning' pain which was more unpredictable and associated with the weather  
23  
24 or prolonged activity(21). Pain was perceived as insurmountable when there was no  
25  
26 foreseeable end to it and made some participants feel 'old'. Carers reported their relatives  
27  
28 with knee osteoarthritis rarely mentioned pain until they needed help(36). Participants  
29  
30 reported managing their pain with medication but that this was not always a satisfactory  
31  
32 strategy due to feelings of dependence, undesirable side-effects, and only partial relief from  
33  
34 symptoms. Other pain management strategies described were activity-related (including  
35  
36 exercise, avoidance of certain activities, brief rest, pacing, and physiotherapy), psychological-  
37  
38 related (having a positive life philosophy, humour, continuing to engage in pleasurable  
39  
40 activities), passive treatment modalities (including ice, heat, massage, Chinese traditional  
41  
42 medicine) and weight loss. Some believed joint replacement was inevitable and the only real  
43  
44 solution for their pain(19, 22). Similarly, carers of relatives with knee osteoarthritis believed  
45  
46 the most promising method to reduce pain was a knee replacement, and often persuaded their  
47  
48 relatives to see a doctor about having surgery(36). In contrast, participants from one study  
49  
50 preferred a natural solution only as they had a negative perception of surgery and saw it as a  
51  
52 last resort(37).  
53  
54  
55  
56  
57  
58  
59  
60

1  
2  
3 *(3) Knee osteoarthritis impacts activity and participation*  
4  
5

6 Participants in 16 studies reported functional limitations due to their knee osteoarthritis  
7 particularly mobility restrictions(19-23, 25, 26, 29-36, 39). Participants predominantly  
8 reported limitations in movements involving weight-bearing such as standing, stair climbing,  
9 squatting, carrying, lifting, kneeling, bending; limitations in self-care activities such as  
10 dressing, toileting, sleeping, cooking; limitations in leisure pursuits such as walking,  
11 gardening, sport, and other forms of exercise, and a fear of falling. Living with knee  
12 osteoarthritis was reported by participants to reduce their physical activity and exercise, and  
13 to become sedentary. Participants described the impact on physical activities was associated  
14 with the severity of their knee osteoarthritis. The combined consequences of pain and  
15 functional limitations was an inability for some participants to participate in paid  
16 employment, or a reduction in work hours affecting household income, or other impacts on  
17 work such as requiring modifications, tiring easily, or being less efficient. For others, living  
18 with knee osteoarthritis meant a loss of independence, and a loss of sleep(22).  
19  
20  
21  
22  
23  
24  
25  
26  
27  
28  
29  
30  
31  
32  
33  
34  
35

36 *(4) Knee osteoarthritis has a social impact*  
37  
38

39 Participants in 10 studies felt their knee osteoarthritis had a substantial social impact(21, 23,  
40 28-30, 32-35, 39). It limited their ability to stay socially connected because of reduced  
41 participation in leisure activities and because of difficulties with taking public transport. For  
42 some participants, the inability to take part in socially-based physical activity, such as  
43 walking with friends or playing sport was the most difficult aspect of this condition.  
44 Participants described social isolation marked by doing fewer activities outside of home.  
45 Participants felt mobility limitations made it conspicuous to others that they had poor health.  
46 Living with knee osteoarthritis reduced their enjoyment of activities, particularly when  
47 travelling. Others described a change in their social relationships conveying that they related  
48 more to older individuals with health problems. Participants also described the repercussions  
49  
50  
51  
52  
53  
54  
55  
56  
57  
58  
59  
60

1  
2  
3 of knee osteoarthritis on family life, reporting difficulties taking care of the family including  
4  
5 looking after grandchildren and playing with their children.  
6  
7

8  
9 *(5) Knee osteoarthritis has an emotional impact*

10  
11 Thirteen studies reported data on the emotional impact participants said they experienced as a  
12  
13 result of having knee osteoarthritis(19-23, 25, 26, 29, 30, 34-36, 39). Living with knee  
14  
15 osteoarthritis was described as being 'difficult' and often described as having a negative  
16  
17 impact on the participant's mood, resulting in feelings of loss, anxiety, inadequacy,  
18  
19 frustration, irritability, emotional distress, depression, embarrassment, fear for the future and  
20  
21 uncertainty of the outcomes of knee pain. Carers reported their relatives with knee  
22  
23 osteoarthritis could lose their temper easily when experiencing severe pain(36). Some  
24  
25 participants reported their mobility limitations in particular devalued their sense of self-worth  
26  
27 because mobility was integral to their identity. Living with knee osteoarthritis made them feel  
28  
29 like 'a partial person', 'less valuable' and losing their identity, since they had to give up  
30  
31 something that was part of their normal life. Other participants talked of a reduced sense of  
32  
33 control or of being 'lost' after being 'told' to eliminate athletic activities and change their  
34  
35 lifestyles. Other participants reported grieving for activities they could no longer take part in,  
36  
37 or their vision of ageing. Participants in one study(21) felt the unpredictability and  
38  
39 uncertainty of living with knee osteoarthritis caused the most stress. While participants in  
40  
41 another study(34) said they dreamed of regaining their previous level of physical activity,  
42  
43 their knee was a major barrier to achieving their dreams.  
44  
45  
46  
47  
48  
49

50  
51 *(6) Interactions with health professionals can be positive or negative*

52  
53 Eleven studies explored the interactions people with knee osteoarthritis described having with  
54  
55 health professionals(18, 19, 25-27, 29, 35, 37-40). Participants said the impact of their  
56  
57 diagnosis was a positive step towards successful management; although for people with low  
58  
59  
60

1  
2  
3 expectations of treatment, the impact of their diagnosis resulted in limited contact with health  
4 professionals. Participants who had positive interactions with health professionals described  
5 being listened to, being offered hope for the future, and being provided with  
6 recommendations for managing knee osteoarthritis including weight loss and exercise.  
7  
8 Participants who had negative experiences interacting with health professionals described  
9 their dissatisfaction with receiving limited information about their condition and the  
10 management options available including ways to avoid aggravating their condition, a sense of  
11 not being listened to, not being given sufficient attention or not understanding the information  
12 provided to them. For example, in one study(29) participants recounted how their symptoms  
13 were viewed by health professionals as something that could not be changed, which they ‘just  
14 had to live with’ or were dismissed as an inevitable part of ageing.  
15  
16  
17  
18  
19  
20  
21  
22  
23  
24  
25  
26  
27  
28

### 29 *(7) Knee osteoarthritis leads to life adjustments*

30  
31 Fourteen studies(19, 21-23, 25, 26, 28, 29, 31, 33-36, 39) reported participants’ descriptions  
32 of adjusting to having knee osteoarthritis in terms of role changes or modifications,  
33 ownership of their health management, awareness of their condition and developing coping  
34 strategies. Participants described taking measures to alleviate their symptoms and protect  
35 their knee joint including lifestyle adjustments by keeping active and controlling their weight,  
36 adapting their work, modifying activities or postures to manage everyday routines (e.g.  
37 climbing stair less frequently and looking for escalators, not carrying heavy things, planning  
38 ahead, looking for places to sit, avoiding situations whereby pain would be intolerable and  
39 avoiding public transport) and seeking out health-related information. In one study(22),  
40 participants described living with knee osteoarthritis as a balancing act recognising the health  
41 benefits from being physically active as well as beliefs about further joint deterioration and  
42 pain. Two studies(23, 33) described a ‘tipping point’ whereby participants arrived at the point  
43  
44  
45  
46  
47  
48  
49  
50  
51  
52  
53  
54  
55  
56  
57  
58  
59  
60

1  
2  
3 where they were giving up all their enjoyable activities with an extensive feeling of loss, and  
4  
5 felt their best option was a knee replacement.  
6  
7

## 8 **Discussion**

9

10  
11 This systematic review provides insights into the experience of living with knee osteoarthritis  
12  
13 as described by the seven emergent themes. While the experience of persistent pain and  
14  
15 disability were the main features of everyday living with knee osteoarthritis, psychological  
16  
17 and social factors such as emotional distress, loss of social contact, and fear for the future  
18  
19 were commonly expressed concerns of the participants. Other common views were the  
20  
21 perceptions of knee osteoarthritis as an inevitable part of ageing, attributing their  
22  
23 osteoarthritic knee to 'wear and tear', and finding ways to adjust their lives until they reach  
24  
25 the 'tipping point' characterised by a perceived need for a knee replacement. A theme  
26  
27 highlighted was unsatisfying relationships between people with knee osteoarthritis and  
28  
29 healthcare professionals if there was limited information about the knee osteoarthritis and  
30  
31 effective management options. Importantly, patient and health professional interactions were  
32  
33 also perceived to provide a positive step towards effective management for people with knee  
34  
35 osteoarthritis.  
36  
37  
38  
39  
40

41  
42 The psychological and social impact of knee osteoarthritis emerged as the key factor in the  
43  
44 lived experience of people with knee osteoarthritis. Previous systematic review analyses have  
45  
46 not focussed on the psychological and social impact of living with knee osteoarthritis(11, 12).  
47  
48 The anxiety, depression and feeling of hopelessness that emerged as a theme in our review  
49  
50 only recently received attention in published clinical practice guidelines. For example,  
51  
52 clinical practice guidelines for management of knee and hip osteoarthritis(41, 42) emphasise  
53  
54 the importance of a holistic assessment to ascertain the impact of osteoarthritis on the whole  
55  
56 person. This included specific recommendations for a psychosocial evaluation to identify  
57  
58 unique factors that may affect a person's quality of life and participation in usual activities,  
59  
60



1  
2  
3 and to embed patient-centred care principles in the management of patients with knee  
4  
5 osteoarthritis. Patient-centred care encourages patient participation in decision making and  
6  
7 communication with patients about their management options. Hence, for some patients,  
8  
9 offering a psychological intervention such as cognitive behavioural therapy may be important  
10  
11 to improve the lived experience and self-management of osteoarthritis.  
12  
13

14  
15 Psychological and social factors such as emotional distress, concerns about disability and  
16  
17 learning to live with pain have been identified among people living with other chronic  
18  
19 musculoskeletal pain conditions(43, 44). Some of the experiences of living with knee  
20  
21 osteoarthritis we identified, such as the perception among the participants in the included  
22  
23 studies that their condition was an inevitable part of ageing, the perceived poor prognosis due  
24  
25 to the ‘progressive degenerative disease’, and the pre-occupation with the existing damage to  
26  
27 their joint and their perceived need for surgery have also been recognised in people with low  
28  
29 back pain(45, 46). An explanation for the perception of ‘damage’ for people with knee  
30  
31 osteoarthritis is likely to have been influenced by the results of imaging as well as the  
32  
33 messages people receive from their health professionals(47). This highlights the importance  
34  
35 that health professionals not only focus on reducing joint-related pain and improving  
36  
37 function, but to also include strategies to address misconceptions about knee osteoarthritis,  
38  
39 such as education that osteoarthritis does not necessarily worsen with ageing and that people  
40  
41 can remain healthy and active with osteoarthritis,(27, 48) as well as help patients participate  
42  
43 in decisions about their management.  
44  
45  
46  
47  
48

49  
50 Our overall findings highlight the importance of equipping patients with information and self-  
51  
52 management strategies to reduce the impact of knee osteoarthritis on their lives, particularly  
53  
54 their psychosocial wellbeing, by reducing pain, maintaining function, increasing social and  
55  
56 physical activity participation, helping patients to remain in employment, and achieve  
57  
58 optimal mental health. For example, one option to address patients’ harmful beliefs and  
59  
60

1  
2  
3 attitudes towards pain and damage is to address the negative or mistaken language and beliefs  
4 about their knee through education. Emphasising facts such as ‘hurt does not equal harm’ and  
5  
6 ‘exercise is safe’(49) and dismissing myths such as ‘exercise is damaging’ may be  
7  
8 fundamental to alter people’s negative attitudes and may be best combined with interventions  
9  
10 such as exercise programs to potentially improve patients’ overall perception of their knee.  
11  
12 Beliefs about a health condition are formed not only from personal experiences, but also from  
13  
14 observing others and external sources of information such as the media. Thus, negative  
15  
16 beliefs about knee osteoarthritis can predate the onset of the condition(50). Therefore, there  
17  
18 may be a role for public health campaigns to dispel myths about knee osteoarthritis across  
19  
20 society more broadly.  
21  
22  
23  
24  
25

26  
27 The main limitation of this systematic review was the exclusion of studies exploring patients’  
28  
29 perceptions of interventions they received such as exercise or perioperative management for  
30  
31 knee osteoarthritis. These experiences in response to biological interventions would be  
32  
33 expected to be different from the experience of living with knee osteoarthritis and should be  
34  
35 the subject of further study. Only one study reported carer perceptions about living with knee  
36  
37 osteoarthritis. Although the themes identified in this single study converged with 5 of the 7  
38  
39 themes, further enquiry may be required to confirm their perceptions. Further, given the  
40  
41 pattern of recurring themes we identified, it is unlikely that the inclusion of subsequent  
42  
43 studies would have substantially added to the themes we described in this review. Finally,  
44  
45 exclusion of non-English language articles limits the generalizability as other cultures with  
46  
47 other languages might have different perceptions of knee osteoarthritis.  
48  
49  
50

## 51 52 **Conclusion**

53  
54  
55 This review highlighted the value of taking patient attitudes and experiences into account,  
56  
57 consistent with patient-centred care, when planning and implementing management options  
58  
59 for people with knee osteoarthritis. These findings could inform clinical practice guidelines,  
60

1  
2  
3 to help clinicians better understand the lived experience of knee osteoarthritis, optimise the  
4 patient-clinician interaction, and provide insights into how patient education may be  
5 conducted. These findings could also lead to new research questions to address patients lived  
6 experience with knee osteoarthritis and interventions to target modifiable psychological and  
7 social factors.  
8  
9  
10  
11  
12  
13  
14

### 15 **Author contributions**

16  
17  
18 JAW: contributed to the conception and design of the review, acquisition of data, analysis  
19 and interpretation of data, contributed to the writing of the paper by revising it critically for  
20 important intellectual content and read and approved the manuscript. NFT: contributed to the  
21 conception and design of the review, acquisition of data, analysis and interpretation of data,  
22 contributed to the writing of the paper by revising it critically for important intellectual  
23 content and read and approved the manuscript. SB: contributed to the conception and design  
24 of the review, acquisition of data, analysis and interpretation of data, contributed to the  
25 writing of the paper by revising it critically for important intellectual content and read and  
26 approved the manuscript. NS: contributed to the conception and design of the review,  
27 acquisition of data, analysis and interpretation of data, contributed to the writing of the paper  
28 by revising it critically for important intellectual content and read and approved the  
29 manuscript.  
30  
31  
32  
33  
34  
35  
36  
37  
38  
39  
40  
41  
42  
43  
44  
45

### 46 **Funding statement**

47  
48 This research received no specific grant from any funding agency in the public, commercial  
49 or not-for-profit sectors.  
50  
51  
52  
53

### 54 **Competing interest statement**

55  
56 All authors declare that they do not have any potential conflicts of interest.  
57  
58  
59  
60

## References

1. Glyn-Jones S, Palmer A, Agricola R, Price A, Vincent T, Weinans H, et al. Osteoarthritis. *Lancet*. 2015;386(9991):376-87.
2. Rayahin JE, Chmiel JS, Hayes KW, Almagor O, Belisle L, Chang AH, et al. Factors associated with pain experience outcome in knee osteoarthritis. *Arthritis Care & Research* 2014;66(12):1828-35.
3. Holla JF, Sanchez-Ramirez DC, van der Leeden M, Ket JC, Roorda LD, Lems WF, et al. The avoidance model in knee and hip osteoarthritis: a systematic review of the evidence. *Journal of Behavioral Medicine* 2014;37(6):1226-41.
4. Arendt-Nielsen L, Nie H, Laursen MB, Laursen BS, Madeleine P, Simonsen OHL, et al. Sensitization in patients with painful knee osteoarthritis. *Pain*. 2010;149(3):573-81.
5. McAlindon TE, Bannuru RR, Sullivan MC, Arden NK, Berenbaum F, Bierma-Zeinstra SM, et al. OARSI guidelines for the non-surgical management of knee osteoarthritis. *Osteoarthritis and Cartilage*. 2014;22(3):363-88.
6. Briggs AM, Page CJ, Shaw BR, Bendrups A, Philip K, Cary B, et al. A model of care for osteoarthritis of the hip and knee: Development of a system-wide plan for the health sector in Victoria, Australia. *Healthcare Policy*. 2018;14(2):47-58.
7. Cubukcu D, Sarsan A, Alkan H. Relationships between pain, function and radiographic findings in osteoarthritis of the knee: a cross-sectional study. *Arthritis*. 2012;doi:10.1155/2012/984060.
8. Hartvigsen J, Hancock MJ, Kongsted A, Louw Q, Ferreira ML, Genevay S, et al. What low back pain is and why we need to pay attention. *Lancet*. 2018;391(10137):2356-67.

- 1  
2  
3 9. O'Sullivan PB, Caneiro JP, O'Keeffe M, Smith A, Dankaerts W, Fersum K, et al.  
4  
5 Cognitive functional therapy: an integrated behavioral approach for the targeted management  
6  
7 of disabling low back pain. *Physical Therapy*. 2018;98(5):408-23.  
8  
9
- 10  
11 10. Thorne S. Toward methodological emancipation in applied health research.  
12  
13 *Qualitative Health Research*. 2011;21(4):443-53.  
14
- 15  
16 11. Smith TO, Purdy R, Lister S, Salter C, Fleetcroft R, Conaghan P. Living with  
17  
18 osteoarthritis: A systematic review and meta-ethnography. *Scandinavian Journal of*  
19  
20 *Rheumatology*. 2014;43(6):441-52.  
21  
22
- 23  
24 12. Wride JM, Bannigan K. 'If you can't help me, so help me God I will cut it off  
25  
26 myself...' The experience of living with knee pain: A qualitative meta-synthesis.  
27  
28 *Physiotherapy*. 2018;104:299-310.  
29
- 30  
31 13. Hubertsson J, Turkiewicz A, Petersson I, Englund M. Understanding occupation, sick  
32  
33 leave and disability pension due to knee and hip osteoarthritis from a sex perspective.  
34  
35 *Arthritis Care Res (Hoboken)*. 2017;69(2):226-33.  
36  
37
- 38  
39 14. Tong A, Flemming K, McInnes E, Oliver S, Craig J. Enhancing transparency in  
40  
41 reporting the synthesis of qualitative research: ENTREQ. *BMC Med Res Methodol*.  
42  
43 2012;12(1):181.  
44
- 45  
46 15. CASP (systematic review). Available from URL: <http://www.casp-uk.net/>: Accessed  
47  
48 Nov 7, 2018; Critical Appraisal Skills Programme, 2018  
49
- 50  
51 16. Synnott A, O'Keeffe M, Bunzli S, Dankaerts W, O'Sullivan P, O'Sullivan K.  
52  
53 Physiotherapists may stigmatise or feel unprepared to treat people with low back pain and  
54  
55 psychosocial factors that influence recovery: a systematic review. *Journal of Physiotherapy*.  
56  
57 2015;61(2):68-76.  
58  
59  
60

17. Egerton T, Diamond LE, Buchbinder R, Bennell KL, Slade SC. A systematic review and evidence synthesis of qualitative studies to identify primary care clinicians' barriers and enablers to the management of osteoarthritis. *Osteoarthritis and Cartilage*. 2017;25(5):625-38.
18. Victor CR, Ross F, Axford J. Capturing lay perspectives in a randomized control trial of a health promotion intervention for people with osteoarthritis of the knee. *Journal of Evaluation in Clinical Practice*. 2004;10(1):63-70.
19. Tallon D, Chard J, Dieppe P. Exploring the priorities of patients with osteoarthritis of the knee. *Arthritis Care Res (Hoboken)*. 2000;13(5):312-9.
20. Ahmad MA, Singh DKA, Qing CW, Rahman AB, Hendri M. Knee osteoarthritis and its related issues: patients' perspective. *Malaysian Journal of Health Sciences*. 2018;16:171-7.
21. Chan KKW, Chan LWY. A qualitative study on patients with knee osteoarthritis to evaluate the influence of different pain patterns on patients' quality of life and to find out patients' interpretation and coping strategies for the disease. *Rheumatology Reports*. 2011;3(1):9-15.
22. Darlow B, Brown M, Thompson B, Hudson B, Grainger R, McKinlay E, et al. Living with osteoarthritis is a balancing act: an exploration of patients' beliefs about knee pain. *BMC Rheumatology*. 2018;2(1):15.
23. Hall M, Migay AM, Persad T, Smith J, Yoshida K, Kennedy D, et al. Individuals' experience of living with osteoarthritis of the knee and perceptions of total knee arthroplasty. *Physiotherapy Theory and Practice*. 2008;24(3):167-81.
24. Sitzia J, Wood N. Patient satisfaction: a review of issues and concepts. *Social Science & Medicine*. 1997;45(12):1829-43.

- 1  
2  
3 25. Carmona-Teres V, Moix-Queralto J, Pujol-Ribera E, Lumillo-Gutierrez I, Mas X,  
4  
5  
6 Battle-Gualda E, et al. Understanding knee osteoarthritis from the patients' perspective: A  
7  
8 qualitative study. *BMC Musculoskelet Disord*. 2017;18(1):225.  
9
- 10  
11 26. Pouli N, Das Nair R, Lincoln NB, Walsh D. The experience of living with knee  
12  
13 osteoarthritis: exploring illness and treatment beliefs through thematic analysis. *Disability &*  
14  
15 *Rehabilitation*. 2014;36(7):600-7.  
16
- 17  
18 27. Hendry M, Williams NH, Markland D, Wilkinson C, Maddison P. Why should we  
19  
20 exercise when our knees hurt? A qualitative study of primary care patients with osteoarthritis  
21  
22 of the knee. *Family Practice*. 2006;23(5):558-67.  
23
- 24  
25 28. Morden A, Jinks C, Ong BN. Lay models of self-management: how do people  
26  
27 manage knee osteoarthritis in context? *Chronic Illness*. 2011;7(3):185-200.  
28
- 29  
30 29. MacKay C, Sale J, Badley EM, Jaglal SB, Davis AM. Qualitative study exploring the  
31  
32 meaning of knee symptoms to adults ages 35-65 Years. *Arthritis Care Res (Hoboken)*.  
33  
34 2016;68(3):341-7.  
35
- 36  
37 30. Xie F, Li SC, Fong KY, Lo NN, Yeo SJ, Yang KY, et al. What health domains and  
38  
39 items are important to patients with knee osteoarthritis? A focus group study in a multiethnic  
40  
41 urban Asian population. *Osteoarthritis and Cartilage*. 2006;14(3):224-30.  
42  
43
- 44  
45 31. Kao MH, Tsai YF. Illness experiences in middle-aged adults with early-stage knee  
46  
47 osteoarthritis: findings from a qualitative study. *Journal of Advanced Nursing*.  
48  
49 2014;70(7):1564-72.  
50
- 51  
52 32. Al-Taiar A, Al-Sabah R, Elsalawy E, Shehab D, Al-Mahmoud S. Attitudes to knee  
53  
54 osteoarthritis and total knee replacement in Arab women: a qualitative study. *BMC Research*  
55  
56 *Notes*. 2013;6:406.  
57  
58  
59  
60

- 1  
2  
3 33. Man A, Davis A, Webster F, Polatajko H. Awaiting knee joint replacement surgery:  
4 An occupational perspective on the experience of osteoarthritis. *Journal of Occupational*  
5  
6 *Science*. 2017;24(2):216-24.  
7  
8  
9  
10 34. Nyvang J, Hedstrom M, Gleissman SA. It's not just a knee, but a whole life: A  
11  
12 qualitative descriptive study on patients' experiences of living with knee osteoarthritis and  
13  
14 their expectations for knee arthroplasty. *International Journal of Qualitative Studies on Health*  
15  
16 *and Well-being*. 2016;11:30193.  
17  
18  
19  
20 35. Keysor JJ, Sparling JW, Riegger-Krugh C. The experience of knee arthritis in athletic  
21  
22 young and middle-aged adults: an heuristic study. *Arthritis Care Res (Hoboken)*.  
23  
24 1998;11(4):261-70.  
25  
26  
27 36. Hsu KY, Y.F. T, Lin YP, Liu HT. Primary family caregivers' observations and  
28  
29 perceptions of their older relatives' knee osteoarthritis pain and pain management: a  
30  
31 qualitative study. *Journal of Advanced Nursing* 2015;71(9):2119-28.  
32  
33  
34  
35 37. Figaro MK, Allegrante JP, Russo PW. Preferences for arthritis care among urban  
36  
37 African Americans: 'I don't want to be cut'. *Health Psychology*. 2004;23(3):324-9.  
38  
39  
40 38. Alami S, Boutron I, Desjeux D, Hirschhorn M, Meric G, Rannou F, et al. Patients' and  
41  
42 practitioners' views of knee osteoarthritis and its management: A qualitative interview study.  
43  
44 *PLoS ONE*. 2011;6 (5)(e19634).  
45  
46  
47 39. Maly MR, Krupa T. Personal experience of living with knee osteoarthritis among  
48  
49 older adults. *Disability & Rehabilitation*. 2007;29(18):1423-33.  
50  
51  
52 40. Kao MH, Tsai YF. Living experiences of middle-aged adults with early knee  
53  
54 osteoarthritis in prediagnostic phase. *Disability & Rehabilitation*. 2012;34(21):1827-34.  
55  
56  
57 41. Guideline for the management of knee and hip osteoarthritis. Available from  
58  
59 URL:<https://www.racgp.org.au/download/Documents/Guidelines/Musculoskeletal/guideline->  
60



1  
2  
3 [for-the-management-of-knee-and-hip-oa-2nd-edition.pdf](#): Accessed Dec 19 2018; Royal  
4  
5 Australian College of General Practitioners, 2018.  
6  
7

8 42. Osteoarthritis: Care and management. UK. Available from URL:  
9

10 <https://nice.org.uk/guidance/cg177>;: Accesed Nov 7 2018; National Institute for Health and  
11  
12 Care Excellence, 2014  
13  
14

15 43. Bunzli S, Watkins R, Smith A, Schutze R, O’Sullivan P. Lives on hold. A qualitative  
16  
17 synthesis exploring the experience of chronic low back pain. *Clinical Journal of Pain*.  
18  
19 2013;29(10):907-16.  
20  
21  
22

23 44. Maher C, Underwood M, Buchbinder R. Non-specific low back pain. *The Lancet*  
24  
25 2017;389(10070):736-47.  
26  
27

28 45. Darlow B, Fullen BM, Dean S, Hurley DA, Baxter GD, Dowell A. The association  
29  
30 between health care professional attitudes and beliefs and the attitudes and beliefs, clinical  
31  
32 management, and outcomes of patients with low back pain: A systematic review. *European*  
33  
34 *Journal of Pain*. 2012;16(1):3-17.  
35  
36  
37

38 46. Darlow B, Forster BB, O’sullivan K, O’sullivan P. It is time to stop causing harm with  
39  
40 inappropriate imaging for low back pain. *Br J Sports Med*. 2017;51(414-415).  
41  
42

43 47. Barker KL, Reid M, Minns Lowe CJ. What does the language we use about arthritis  
44  
45 mean to people who have osteoarthritis? A qualitative study. *Disabil Rehabil*.  
46  
47 2014;36(5):367-72.  
48  
49

50 48. Gay C, Eschalier B, Levyckyj C, Bonnin A, Coudeyre E. Motivators for and barriers  
51  
52 to physical activity in people with knee osteoarthritis: A qualitative study (Article in Press).  
53  
54 *Joint Bone Spine*. 2017.  
55  
56  
57  
58  
59  
60

1  
2  
3 49. Quicke JG, Foster NE, Thomas MJ, Holden MA. Is long-term physical activity safe  
4 for older adults with knee pain?: a systematic review. *Osteoarthritis Cartilage*.

5  
6  
7 2015;23(9):1445-56.

8  
9  
10 50. Leventhal H, Philips LA, Burns E. The Common Sense Model of Self Regulation  
11 (CSM): a dynamic framework for understanding illness self management. *Journal of*

12  
13  
14  
15  
16  
17  
18  
19  
20  
21  
22  
23  
24  
25  
26  
27  
28  
29  
30  
31  
32  
33  
34  
35  
36  
37  
38  
39  
40  
41  
42  
43  
44  
45  
46  
47  
48  
49  
50  
51  
52  
53  
54  
55  
56  
57  
58  
59  
60  
Behavioral Medicine. 2016;39(6):935-46.

For peer review only

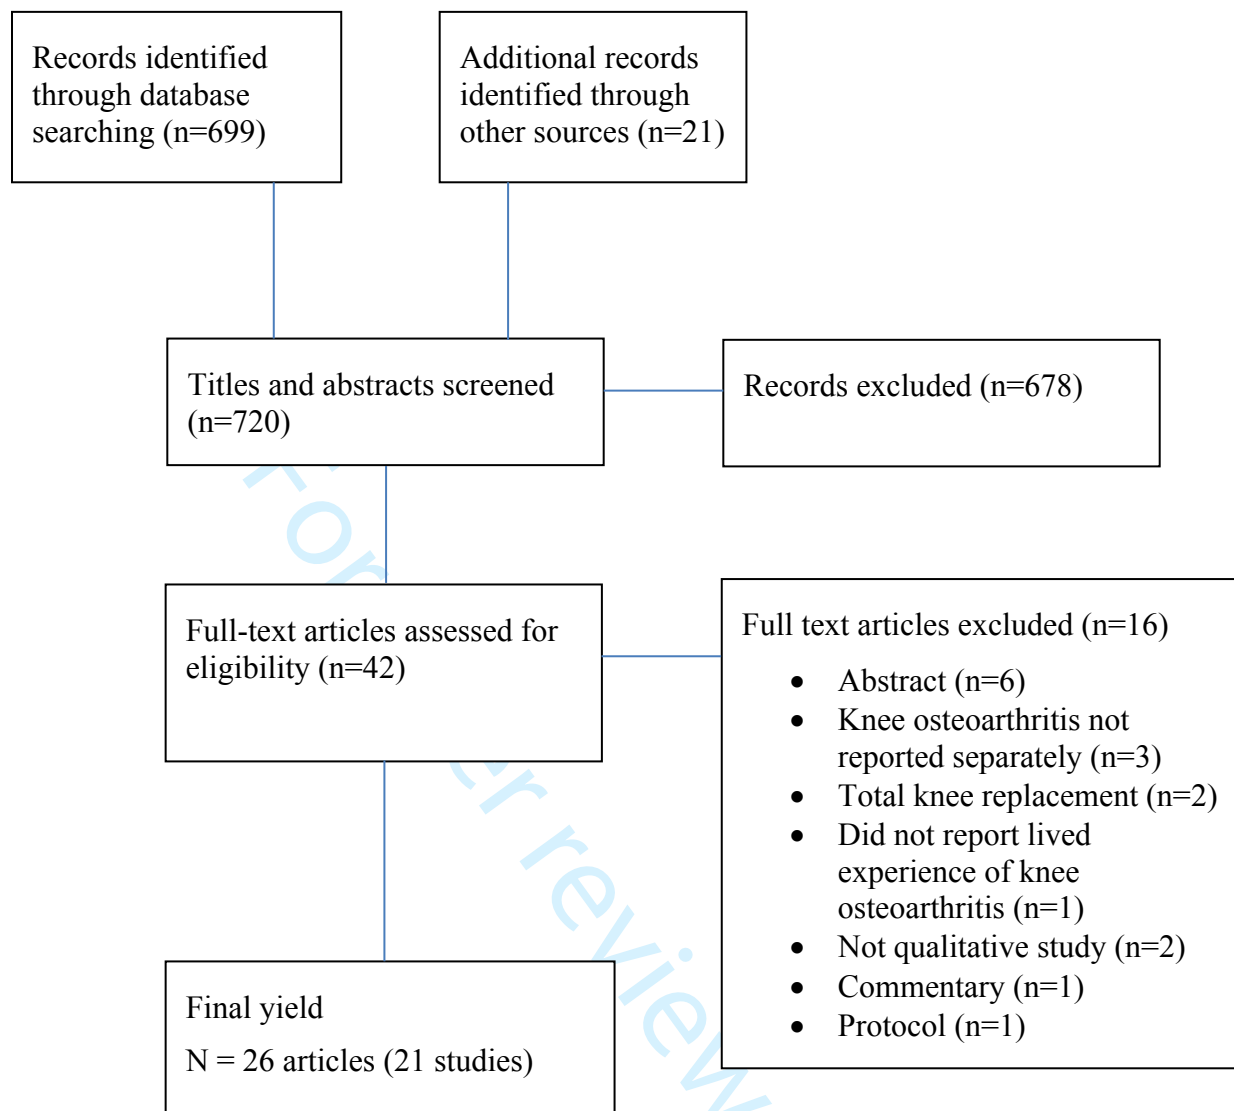

**PROSPERO****International prospective register of systematic reviews**

UNIVERSITY of York  
Centre for Reviews and Dissemination

**Systematic review****1. \* Review title.**

Give the working title of the review, for example the one used for obtaining funding. Ideally the title should state succinctly the interventions or exposures being reviewed and the associated health or social problems. Where appropriate, the title should use the PI(E)COS structure to contain information on the Participants, Intervention (or Exposure) and Comparison groups, the Outcomes to be measured and Study designs to be included.

The experience of living with knee osteoarthritis: a systematic review

**2. Original language title.**

For reviews in languages other than English, this field should be used to enter the title in the language of the review. This will be displayed together with the English language title.

**3. \* Anticipated or actual start date.**

Give the date when the systematic review commenced, or is expected to commence.

12/10/2018

**4. \* Anticipated completion date.**

Give the date by which the review is expected to be completed.

19/12/2018

**5. \* Stage of review at time of this submission.**

Indicate the stage of progress of the review by ticking the relevant Started and Completed boxes. Additional information may be added in the free text box provided.

Please note: Reviews that have progressed beyond the point of completing data extraction at the time of initial registration are not eligible for inclusion in PROSPERO. Should evidence of incorrect status and/or completion date being supplied at the time of submission come to light, the content of the PROSPERO record will be removed leaving only the title and named contact details and a statement that inaccuracies in the stage of the review date had been identified.

This field should be updated when any amendments are made to a published record and on completion and publication of the review. If this field was pre-populated from the initial screening questions then you are not able to edit it until the record is published.

The review has not yet started: No

## PROSPERO

### International prospective register of systematic reviews

| Review stage                                                    | Started | Completed |
|-----------------------------------------------------------------|---------|-----------|
| Preliminary searches                                            | Yes     | Yes       |
| Piloting of the study selection process                         | Yes     | Yes       |
| Formal screening of search results against eligibility criteria | Yes     | No        |
| Data extraction                                                 | No      | No        |
| Risk of bias (quality) assessment                               | No      | No        |
| Data analysis                                                   | No      | No        |

Provide any other relevant information about the stage of the review here (e.g. Funded proposal, protocol not yet finalised).

#### 6. \* Named contact.

The named contact acts as the guarantor for the accuracy of the information presented in the register record.

Jason Wallis

#### Email salutation (e.g. "Dr Smith" or "Joanne") for correspondence:

Dr Wallis

#### 7. \* Named contact email.

Give the electronic mail address of the named contact.

jason.wallis@easternhealth.org.au

#### 8. Named contact address

Give the full postal address for the named contact.

Allied Health Clinical Research Office, level 2/5 Arnold Street, Box Hill, Victoria, Australia, 3128

#### 9. Named contact phone number.

Give the telephone number for the named contact, including international dialling code.

61 3 9895 3715

#### 10. \* Organisational affiliation of the review.

Full title of the organisational affiliations for this review and website address if available. This field may be completed as 'None' if the review is not affiliated to any organisation.

Eastern Health

#### Organisation web address:

www.easternhealth.org.au

#### 11. \* Review team members and their organisational affiliations.

Give the title, first name, last name and the organisational affiliations of each member of the review team. Affiliation refers to groups or organisations to which review team members belong.

**PROSPERO****International prospective register of systematic reviews**

Dr Jason Wallis. La Trobe University, Eastern Health  
Professor Nicholas Taylor. La Trobe University, Eastern Health  
Dr Samantha Bunzli. The University of Melbourne  
Professor Nora Shields. La Trobe University

**12. \* Funding sources/sponsors.**

Give details of the individuals, organizations, groups or other legal entities who take responsibility for initiating, managing, sponsoring and/or financing the review. Include any unique identification numbers assigned to the review by the individuals or bodies listed.

None

**13. \* Conflicts of interest.**

List any conditions that could lead to actual or perceived undue influence on judgements concerning the main topic investigated in the review.

None

**14. Collaborators.**

Give the name and affiliation of any individuals or organisations who are working on the review but who are not listed as review team members.

**15. \* Review question.**

State the question(s) to be addressed by the review, clearly and precisely. Review questions may be specific or broad. It may be appropriate to break very broad questions down into a series of related more specific questions. Questions may be framed or refined using PI(E)COS where relevant.

What are the experiences of living with knee osteoarthritis from the perspectives of patients and their caregivers?

**16. \* Searches.**

Give details of the sources to be searched, search dates (from and to), and any restrictions (e.g. language or publication period). The full search strategy is not required, but may be supplied as a link or attachment.

Five electronic databases (CINAHL, Embase, MEDLINE, PsycINFO, SPORTDiscus) will be searched from inception until October 2018. English language articles will be included.

Manually checking reference lists of included studies and citation tracking of included studies using Google Scholar will be used to identify additional relevant studies.

**17. URL to search strategy.**

Give a link to a published pdf/word document detailing either the search strategy or an example of a search strategy for a specific database if available (including the keywords that will be used in the search strategies), or upload your search strategy. Do NOT provide links to your search results.

[https://www.crd.york.ac.uk/PROSPEROFILES/108962\\_STRATEGY\\_20181206.pdf](https://www.crd.york.ac.uk/PROSPEROFILES/108962_STRATEGY_20181206.pdf)

Alternatively, upload your search strategy to CRD in pdf format. Please note that by doing so you are consenting to the file being made publicly accessible.

Yes I give permission for this file to be made publicly available

**18. \* Condition or domain being studied.**

## PROSPERO

### International prospective register of systematic reviews

Give a short description of the disease, condition or healthcare domain being studied. This could include health and wellbeing outcomes.

Knee osteoarthritis is a common chronic disease affecting adults and older adults. The main symptom associated with knee osteoarthritis is pain, with or without stiffness and swelling around the joint. People with knee osteoarthritis often have difficulty with mobility and other everyday activities, which in turn can affect participation in work and leisure activities.

The experience of chronic pain associated with knee osteoarthritis is multidimensional comprising of biological, psychological and social dimensions. The experience and construct of pain associated with knee osteoarthritis may be best explored with qualitative analysis. Qualitative analysis can also play an important complementary role to quantitative methods in knee osteoarthritis research.

#### 19. \* Participants/population.

Give summary criteria for the participants or populations being studied by the review. The preferred format includes details of both inclusion and exclusion criteria.

People diagnosed with knee osteoarthritis and their caregivers will be included. Participants not identified as having knee osteoarthritis (e.g. knee pain, ACL injury) will be excluded.

#### 20. \* Intervention(s), exposure(s).

Give full and clear descriptions or definitions of the nature of the interventions or the exposures to be reviewed.

No interventions are included in this review.

#### 21. \* Comparator(s)/control.

Where relevant, give details of the alternatives against which the main subject/topic of the review will be compared (e.g. another intervention or a non-exposed control group). The preferred format includes details of both inclusion and exclusion criteria.

No control groups are included in this review.

#### 22. \* Types of study to be included.

Give details of the types of study (study designs) eligible for inclusion in the review. If there are no restrictions on the types of study design eligible for inclusion, or certain study types are excluded, this should be stated. The preferred format includes details of both inclusion and exclusion criteria.

Full text articles published in a peer review journal that used qualitative methods will be included in this review. Questionnaires, surveys, single case studies and systematic reviews of qualitative research will be excluded from this review.

#### 23. Context.

Give summary details of the setting and other relevant characteristics which help define the inclusion or exclusion criteria.

In results we will report the country of origin, and participant details including age, sex, disease severity, and body mass index. Note these settings and characteristics will not be included in the selection criteria.

## PROSPERO

### International prospective register of systematic reviews

#### 24. \* Main outcome(s).

Give the pre-specified main (most important) outcomes of the review, including details of how the outcome is defined and measured and when these measurement are made, if these are part of the review inclusion criteria.

A descriptive analysis, based on a content analysis approach, will be used to identify and discuss themes related to the experiences of living with knee osteoarthritis from patients with knee osteoarthritis and their caregivers.

#### Timing and effect measures

#### 25. \* Additional outcome(s).

List the pre-specified additional outcomes of the review, with a similar level of detail to that required for main outcomes. Where there are no additional outcomes please state 'None' or 'Not applicable' as appropriate to the review

None..

#### Timing and effect measures

#### 26. \* Data extraction (selection and coding).

Give the procedure for selecting studies for the review and extracting data, including the number of researchers involved and how discrepancies will be resolved. List the data to be extracted.

Two reviewers will independently review the titles and abstracts yielded according to the selection criteria.

Any discrepancies will be resolved through discussion between the two reviewers. A third reviewer will be used to achieve consensus, if required.

Data to be extracted from each study will include: country of origin, participant demographics (e.g. number of participants, severity of osteoarthritis, age, sex, and body mass index), qualitative design of the individual studies including data collection method (interviews or focus groups) and qualitative frameworks informing the analyses.

#### 27. \* Risk of bias (quality) assessment.

State whether and how risk of bias will be assessed (including the number of researchers involved and how discrepancies will be resolved), how the quality of individual studies will be assessed, and whether and how this will influence the planned synthesis.

The Critical Appraisal Skills Programme (CASP) checklist will be used for qualitative study results. The CASP checklist provides decision rules and instructions on how to interpret checklist criteria. Two reviewers will independently apply the CASP checklist with any discrepancies will be resolved through discussion between the two reviewers. A third reviewer will be used to achieve consensus, if required. Results of the quality assessment may influence and inform the interpretation of results and planned synthesis.

#### 28. \* Strategy for data synthesis.

Give the planned general approach to synthesis, e.g. whether aggregate or individual participant data will be used and whether a quantitative or narrative (descriptive) synthesis is planned. It is acceptable to state that a



## PROSPERO

### International prospective register of systematic reviews

quantitative synthesis will be used if the included studies are sufficiently homogenous.

A descriptive synthesis, including a content analysis approach is planned. The number of studies supporting an identified theme will be noted.

#### 29. \* Analysis of subgroups or subsets.

Give details of any plans for the separate presentation, exploration or analysis of different types of participants (e.g. by age, disease status, ethnicity, socioeconomic status, presence or absence or co-morbidities); different types of intervention (e.g. drug dose, presence or absence of particular components of intervention); different settings (e.g. country, acute or primary care sector, professional or family care); or different types of study (e.g. randomised or non-randomised).

We plan to analyse the experiences of caregivers separately from patients with knee osteoarthritis.

#### 30. \* Type and method of review.

Select the type of review and the review method from the lists below. Select the health area(s) of interest for your review.

##### Type of review

Cost effectiveness  
No

Diagnostic  
No

Epidemiologic  
No

Individual patient data (IPD) meta-analysis  
No

Intervention  
No

Meta-analysis  
No

Methodology  
No

Narrative synthesis  
Yes

Network meta-analysis  
No

Pre-clinical  
No

Prevention  
No

Prognostic  
No

Prospective meta-analysis (PMA)  
No

Review of reviews  
No

Service delivery  
No

Synthesis of qualitative studies  
Yes

Systematic review

**PROSPERO**
**International prospective register of systematic reviews**

 1  
2  
3  
4 Yes

5 Other

6 No

 7  
8  
9 **Health area of the review**

10 Alcohol/substance misuse/abuse

11 No

12 Blood and immune system

13 No

14 Cancer

15 No

16 Cardiovascular

17 No

18 Care of the elderly

19 No

20 Child health

21 No

22 Complementary therapies

23 No

24 Crime and justice

25 No

26 Dental

27 No

28 Digestive system

29 No

30 Ear, nose and throat

31 No

32 Education

33 No

34 Endocrine and metabolic disorders

35 No

36 Eye disorders

37 No

38 General interest

39 No

40 Genetics

41 No

42 Health inequalities/health equity

43 No

44 Infections and infestations

45 No

46 International development

47 No

48 Mental health and behavioural conditions

49 No

50 Musculoskeletal

51 Yes

52 Neurological

53 No

54 Nursing

55 No

56 Obstetrics and gynaecology

57 No

58 Oral health

59 No

60 Palliative care

## PROSPERO

### International prospective register of systematic reviews

1 No  
 2 Perioperative care  
 3 No  
 4 Physiotherapy  
 5 No  
 6 Pregnancy and childbirth  
 7 No  
 8 Public health (including social determinants of health)  
 9 No  
 10 Rehabilitation  
 11 No  
 12 Respiratory disorders  
 13 No  
 14 Service delivery  
 15 No  
 16 Skin disorders  
 17 No  
 18 Social care  
 19 No  
 20 Surgery  
 21 No  
 22 Tropical Medicine  
 23 No  
 24 Urological  
 25 No  
 26 Wounds, injuries and accidents  
 27 No  
 28 Violence and abuse  
 29 No  
 30  
 31  
 32

### 31. Language.

Select each language individually to add it to the list below, use the bin icon to remove any added in error.  
 English

There is not an English language summary

### 32. Country.

Select the country in which the review is being carried out from the drop down list. For multi-national collaborations select all the countries involved.

Australia

### 33. Other registration details.

Give the name of any organisation where the systematic review title or protocol is registered (such as with The Campbell Collaboration, or The Joanna Briggs Institute) together with any unique identification number assigned. (N.B. Registration details for Cochrane protocols will be automatically entered). If extracted data will be stored and made available through a repository such as the Systematic Review Data Repository (SRDR), details and a link should be included here. If none, leave blank.

### 34. Reference and/or URL for published protocol.

Give the citation and link for the published protocol, if there is one

Give the link to the published protocol.

Alternatively, upload your published protocol to CRD in pdf format. Please note that by doing so you are consenting to the file being made publicly accessible.

No I do not make this file publicly available until the review is complete

## PROSPERO

### International prospective register of systematic reviews

Please note that the information required in the PROSPERO registration form must be completed in full even if access to a protocol is given.

#### 35. Dissemination plans.

Give brief details of plans for communicating essential messages from the review to the appropriate audiences.

We plan to publish this review in a peer-reviewed journal

#### Do you intend to publish the review on completion?

Yes

#### 36. Keywords.

Give words or phrases that best describe the review. Separate keywords with a semicolon or new line. Keywords will help users find the review in the Register (the words do not appear in the public record but are included in searches). Be as specific and precise as possible. Avoid acronyms and abbreviations unless these are in wide use.

Knee Osteoarthritis; Qualitative

#### 37. Details of any existing review of the same topic by the same authors.

Give details of earlier versions of the systematic review if an update of an existing review is being registered, including full bibliographic reference if possible.

#### 38. \* Current review status.

Review status should be updated when the review is completed and when it is published. For new registrations the review must be Ongoing. Please provide anticipated publication date

Review\_Ongoing

#### 39. Any additional information.

Provide any other information the review team feel is relevant to the registration of the review.

#### 40. Details of final report/publication(s).

This field should be left empty until details of the completed review are available.

Give the link to the published review.

**Checklist: Enhancing transparency in reporting the synthesis of qualitative research (ENTREQ)**

|   | Item                       | Guide and description                                                                                                                                                                                                                                                                                                                                                                                             | Evidence in manuscript                                                                                                                                                                                                                                                                      |
|---|----------------------------|-------------------------------------------------------------------------------------------------------------------------------------------------------------------------------------------------------------------------------------------------------------------------------------------------------------------------------------------------------------------------------------------------------------------|---------------------------------------------------------------------------------------------------------------------------------------------------------------------------------------------------------------------------------------------------------------------------------------------|
| 1 | Aim                        | State the research question the synthesis addresses.                                                                                                                                                                                                                                                                                                                                                              | Research question included in introduction on page 5..                                                                                                                                                                                                                                      |
| 2 | Synthesis methodology      | Identify the synthesis methodology or theoretical framework which underpins the synthesis and describe the rationale for choice of methodology ( <i>e.g. meta-ethnography, thematic synthesis, critical interpretive synthesis, grounded theory synthesis, realist synthesis, meta-aggregation, meta-study, framework synthesis</i> ).                                                                            | The theoretical framework was a thematic analysis and content analysis included in the methods section of manuscript on page 9 lines 158-63.<br>The rationale using this inductive approach to address the limitations in quantitative research was included in the introduction on page 4. |
| 3 | Approach to searching      | Indicate whether the search was pre-planned ( <i>comprehensive search strategies to seek all available studies</i> ) or iterative ( <i>to seek all available concepts until they theoretical saturation is achieved</i> ).                                                                                                                                                                                        | A pre-planned search was applied and registered on Prospero - registration number CRD42018108962<br><a href="https://www.crd.york.ac.uk/PROSPERO">https://www.crd.york.ac.uk/PROSPERO</a> .<br>Page 6.                                                                                      |
| 4 | Inclusion criteria         | Specify the inclusion/exclusion criteria ( <i>e.g. in terms of population, language, year limits, type of publication, study type</i> ).                                                                                                                                                                                                                                                                          | Eligibility criteria included in methods section, pages 6-7.                                                                                                                                                                                                                                |
| 5 | Data sources               | Describe the information sources used ( <i>e.g. electronic databases (MEDLINE, EMBASE, CINAHL, psycINFO, Econlit), grey literature databases (digital thesis, policy reports), relevant organisational websites, experts, information specialists, generic web searches (Google Scholar) hand searching, reference lists</i> ) and when the searches conducted; provide the rationale for using the data sources. | The search strategy and rationale is included in methods section of manuscript on page 6.                                                                                                                                                                                                   |
| 6 | Electronic Search strategy | Describe the literature search ( <i>e.g. provide electronic search strategies with population terms, clinical or health topic terms, experiential or social phenomena related terms, filters for qualitative research, and search limits</i> ).                                                                                                                                                                   | The search strategy was included in methods section of manuscript on page 6, lines 119-29.<br>An example of the strategy using Medline was included (appendix, page 8).                                                                                                                     |
| 7 | Study screening methods    | Describe the process of study screening and sifting ( <i>e.g. title, abstract and full text review, number of independent reviewers who screened studies</i> ).                                                                                                                                                                                                                                                   | This screening process was included in the search strategy in methods section of manuscript on page 6.                                                                                                                                                                                      |

|    | Item                    | Guide and description                                                                                                                                                                                                                                                                                                                                                                             | Evidence in manuscript                                                                                                                                                                    |
|----|-------------------------|---------------------------------------------------------------------------------------------------------------------------------------------------------------------------------------------------------------------------------------------------------------------------------------------------------------------------------------------------------------------------------------------------|-------------------------------------------------------------------------------------------------------------------------------------------------------------------------------------------|
| 8  | Study characteristics   | Present the characteristics of the included studies ( <i>e.g. year of publication, country, population, number of participants, data collection, methodology, analysis, research questions</i> ).                                                                                                                                                                                                 | The study characteristics were included in Table 2 (pages 12-14).                                                                                                                         |
| 9  | Study selection results | Identify the number of studies screened and provide reasons for study exclusion ( <i>e.g. for comprehensive searching, provide numbers of studies screened and reasons for exclusion indicated in a figure/flowchart; for iterative searching describe reasons for study exclusion and inclusion based on modifications to the research question and/or contribution to theory development</i> ). | Study selection results were included in results section of the manuscript on page 10 and Figure 1.                                                                                       |
| 10 | Rationale for appraisal | Describe the rationale and approach used to appraise the included studies or selected findings ( <i>e.g. assessment of conduct (validity and robustness), assessment of reporting (transparency), assessment of content and utility of the findings</i> ).                                                                                                                                        | We used a checklist (CASP) that is commonly applied in qualitative reviews in musculoskeletal research. This is included in the methods section on page 9..                               |
| 11 | Appraisal items         | State the tools, frameworks and criteria used to appraise the studies or selected findings ( <i>e.g. Existing tools: CASP, QARI, COREQ, Mays and Pope[25]; reviewer developed tools; describe the domains assessed: research team, study design, data analysis and interpretations, reporting</i> ).                                                                                              | The CASP checklist assesses the validity of the results, ethics, trustworthiness, clarity and value of results. This is included in the methods section on page 9..                       |
| 12 | Appraisal process       | Indicate whether the appraisal was conducted independently by more than one reviewer and if consensus was required.                                                                                                                                                                                                                                                                               | The CASP appraisal was applied independently by two reviewers, included in methods section of manuscript on page 9.                                                                       |
| 13 | Appraisal results       | Present results of the quality assessment and indicate which articles, if any, were weighted/excluded based on the assessment and give the rationale.                                                                                                                                                                                                                                             | The results of the appraisal were included in results section of manuscript on page 10, lines 174-81, and Table 3.                                                                        |
| 14 | Data extraction         | Indicate which sections of the primary studies were analysed and how were the data extracted from the primary studies? ( <i>e.g. all text under the headings "results /conclusions" were extracted electronically and entered into a computer software</i> ).                                                                                                                                     | The text used to describe themes and sub-themes in the primary studies were assigned descriptive codes using an inductive process. - Included in methods section of manuscript on page 9. |
| 15 | Software                | State the computer software used, if any.                                                                                                                                                                                                                                                                                                                                                         | The search results were downloaded into bibliographic software (Endnote Version 18), included in the methods, section of the manuscript                                                   |

|    | Item                 | Guide and description                                                                                                                                                                                                                  | Evidence in manuscript                                                                                                                                                                                                                                                                                                              |
|----|----------------------|----------------------------------------------------------------------------------------------------------------------------------------------------------------------------------------------------------------------------------------|-------------------------------------------------------------------------------------------------------------------------------------------------------------------------------------------------------------------------------------------------------------------------------------------------------------------------------------|
|    |                      |                                                                                                                                                                                                                                        | on page 6..                                                                                                                                                                                                                                                                                                                         |
| 16 | Number of reviewers  | Identify who was involved in coding and analysis.                                                                                                                                                                                      | Included the data analysis section of the methods on page 9..                                                                                                                                                                                                                                                                       |
| 17 | Coding               | Describe the process for coding of data ( <i>e.g. line by line coding to search for concepts</i> ).                                                                                                                                    | The coding process was included the data analysis section of the methods on page 9.                                                                                                                                                                                                                                                 |
| 18 | Study comparison     | Describe how were comparisons made within and across studies ( <i>e.g. subsequent studies were coded into pre-existing concepts, and new concepts were created when deemed necessary</i> ).                                            | A content analysis approach enabled comparison within and across studies, included in the data analysis section of the methods on page 9..                                                                                                                                                                                          |
| 19 | Derivation of themes | Explain whether the process of deriving the themes or constructs was inductive or deductive.                                                                                                                                           | An inductive process was used and reported in the data analysis section in the methods, page 9..                                                                                                                                                                                                                                    |
| 20 | Quotations           | Provide quotations from the primary studies to illustrate themes/constructs and identify whether the quotations were participant quotations of the author's interpretation.                                                            | Included in the results section of the manuscript.<br>An example of a quotation included for theme one was 'a progressive degenerative disease' on page 17..                                                                                                                                                                        |
| 21 | Synthesis output     | Present rich, compelling and useful results that go beyond a summary of the primary studies ( <i>e.g. new interpretation, models of evidence, conceptual models, analytical framework, development of a new theory or construct</i> ). | Included in the discussion section of the manuscript e.g. "The psychosocial impact of knee osteoarthritis emerged as the key factor in the lived experience of people with knee osteoarthritis."<br>Previous systematic review analyses have not focused on the psychological and social impact of living with knee osteoarthritis. |

# BMJ Open

## The experience of living with knee osteoarthritis: A systematic review of qualitative studies

|                                 |                                                                                                                                                                                                                                                                        |
|---------------------------------|------------------------------------------------------------------------------------------------------------------------------------------------------------------------------------------------------------------------------------------------------------------------|
| Journal:                        | <i>BMJ Open</i>                                                                                                                                                                                                                                                        |
| Manuscript ID                   | bmjopen-2019-030060.R1                                                                                                                                                                                                                                                 |
| Article Type:                   | Original research                                                                                                                                                                                                                                                      |
| Date Submitted by the Author:   | 26-Jul-2019                                                                                                                                                                                                                                                            |
| Complete List of Authors:       | Wallis, Jason ; La Trobe University, Allied Health<br>Taylor, Nicholas ; La Trobe University, Allied Health<br>Bunzli, Samantha; University of Melbourne Saint Vincent's Department of Surgery, Depart of Surgery<br>Shields, Nora; La Trobe University, Allied Health |
| <b>Primary Subject Heading</b>: | Qualitative research                                                                                                                                                                                                                                                   |
| Secondary Subject Heading:      | Rehabilitation medicine, Patient-centred medicine, Public health                                                                                                                                                                                                       |
| Keywords:                       | lived experience, qualitative, systematic review, osteoarthritis, Knee < ORTHOPAEDIC & TRAUMA SURGERY                                                                                                                                                                  |
|                                 |                                                                                                                                                                                                                                                                        |

SCHOLARONE™  
Manuscripts



1  
2  
3  
4 **The experience of living with knee osteoarthritis: A systematic review of qualitative**  
5  
6 **studies**  
7

8  
9 **Authors**  
10

- 11 1. Jason A Wallis, PhD, School of Allied Health, La Trobe University; Allied Health  
12  
13 Clinical Research Office, Eastern Health, Australia  
14  
15  
16 2. Nicholas F Taylor, PhD, School of Allied Health, La Trobe University; Allied Health  
17  
18 Clinical Research Office, Eastern Health, Australia  
19  
20  
21 3. Samantha Bunzli, PhD, Department of Surgery, The University of Melbourne, St  
22  
23 Vincent's Hospital, Australia  
24  
25  
26 4. Nora Shields, PhD, School of Allied Health, La Trobe University, Australia  
27

28 **Correspondence (for review and publication):**  
29

30  
31 Name: Dr Jason A Wallis  
32

33  
34 Institution: Monash Department of Clinical Epidemiology, Cabrini Institute  
35  
36 4 Drysdale Street, Malvern, Victoria, 3144, Australia  
37

38  
39 **Tel/Fax:** +61 3 9508 3468 +61 3 9508 3406  
40

41  
42 Email: [jwallis@cabrini.com.au](mailto:jwallis@cabrini.com.au); [jason.wallis@latrobe.edu.au](mailto:jason.wallis@latrobe.edu.au)  
43

44 **Running title:** Lived experience of knee osteoarthritis  
45

46  
47 **Key words:** lived experience, qualitative, systematic review, osteoarthritis, knee  
48

49  
50 **Word count manuscript:** 4538  
51  
52  
53  
54  
55  
56  
57  
58  
59  
60

## ABSTRACT

Objectives: Systematically review the qualitative literature on living with knee osteoarthritis from patient and carer perspectives.

Design: Systematic review of qualitative studies. Five electronic databases (CINAHL, Embase, Medline, Psychinfo, SPORTDiscus) were searched from inception until October 2018. Data were synthesised using thematic and content analysis.

Participants: Studies exploring the experiences of people living with knee osteoarthritis, and their carers were included. Studies exploring experiences of patients having participated in specific interventions, including surgery, or their attitudes about the decision to proceed to knee replacement were excluded.

Results: Twenty-six articles reporting data from 21 studies about the patient (n=665) and carer (n=28) experience of living with knee osteoarthritis were included. Seven themes emerged: (1) Perceived causes of knee osteoarthritis are multifactorial and lead to structural damage to the knee and deterioration over time (n=13 studies); (2) Pain and how to manage it predominates the lived experience (n=19 studies); (3) Knee osteoarthritis impacts activity and participation (n=16 studies); (4) Knee osteoarthritis has a social impact (n=10 studies); (5) Knee osteoarthritis has an emotional impact (n=13 studies); (6) Interactions with health professionals can be positive or negative (n=11 studies); (7) Knee osteoarthritis leads to life adjustments (n=14 studies). A single study reporting the perspectives of carers reported similar themes. Psychosocial impact of knee osteoarthritis emerged as a key factor in the lived experience of people with knee osteoarthritis.

Conclusions: This review highlights the value of considering patient attitudes and experiences including psychosocial factors when planning and implementing management options for people with knee osteoarthritis. Trial registration: PROSPERO registration number CRD42018108962

### Strengths and limitations of this study

- The systematic review was reported consistent with the Enhancing Transparency in Reporting the Synthesis of Qualitative Research (ENTREQ) and registered prospectively with PROSPERO (registration number CRD42018108962).
- A comprehensive search strategy of qualitative studies about patient and carer perceptions about their lived experience with knee osteoarthritis was conducted.
- Comprehensive data synthesis was applied using thematic and content analysis leading to results that went beyond the summary of the selected studies.
- The findings of this review are limited to the experience of living with knee osteoarthritis, and not the experience of receiving specific interventions, including surgery.
- Exclusion of non-English language articles limits the generalizability as other cultures with other languages might have different perceptions of knee osteoarthritis.

## Introduction

The experience of living with chronic pain associated with knee osteoarthritis is multidimensional comprising biological dimensions such as subchondral bone pathology and inflammation(1), and psychological and social dimensions such as pain catastrophizing, depression, avoidance of activities and social support(2-4). The current management of knee osteoarthritis is focussed on pain management to address biological dimensions (joint pathology), through joint-specific exercises, pharmacology and in advanced stages, joint replacement surgery(5, 6). However, levels of pain and disability reported by people with osteoarthritis are poorly correlated with radiographic severity of joint pathology, suggesting other factors apart from biological dimensions can affect the experience of living with knee osteoarthritis(7). Further, knee replacement surgery to address joint pathology, does not always have a successful outcome. Only about 40% of patients report being pain free two years after surgery(8), and about 20% were not satisfied with surgical outcome one year after surgery(9).

The role of psychological and social dimensions in the management of knee osteoarthritis has received relatively little attention in comparison with management of joint pathology(2). In other chronic musculoskeletal conditions, the role of psychological and social dimensions has been studied extensively(10). For example, in chronic low back pain, psychological and social factors have been shown to play a role in the persistence of pain, and interventions designed to target these factors can improve pain, disability and quality of life in this population(11, 12). Targeting the psychological and social dimensions of knee osteoarthritis in addition to the biological dimensions, consistent with a biopsychosocial approach, may optimise outcomes. There is preliminary evidence from a systematic review and meta-analysis of 12 randomised controlled trials showing psychological interventions, such as cognitive behavioural therapy, are associated with short-term reductions in pain for people

1  
2  
3 with knee osteoarthritis(13). Further, there is preliminary evidence from a randomised  
4 controlled trial that combining physiotherapist-delivered pain coping skills training,  
5  
6 combined with exercise therapy, can lead to greater improvements in function compared to  
7  
8 either treatment alone(14). In order to design targeted interventions consistent with a  
9  
10 biopsychosocial approach, we must first understand the psychological and social dimensions  
11  
12 of knee osteoarthritis from the perspectives of people living with the condition.  
13  
14  
15

16  
17 Qualitative research provides insight into the lived experience of health and how individuals'  
18 make sense of their health symptoms. Rather than relying on the a priori assumptions of  
19  
20 researchers or clinicians, qualitative research prioritises the voice of the 'expert' participant,  
21  
22 thus shedding light on aspects of the lived experience that cannot be reached by quantitative  
23  
24 approaches(15). Two recent systematic reviews have synthesised qualitative research related  
25  
26 to knee pain, including people living with osteoarthritis(16, 17). Wride et al(17) explored the  
27  
28 feelings and experiences of people living with knee pain from nine studies, three of which  
29  
30 included people with non-osteoarthritic related knee pain. This review found many people  
31  
32 with knee pain struggle to adapt to normal living, and that their negative experiences were  
33  
34 exacerbated by a lack of knowledge and available information to help them plan for the  
35  
36 future. In another review, Smith et al(16) explored the perceptions of people diagnosed with  
37  
38 hip and/or knee osteoarthritis from 32 studies (18 of which sampled people with knee  
39  
40 osteoarthritis only) to determine their attitudes and perceptions towards living with their  
41  
42 musculoskeletal condition. Participants in these studies reported a number of factors that  
43  
44 contributed to their negative attitude and perception about their hip and/or knee osteoarthritis,  
45  
46 such as their understanding of the pathology of osteoarthritis, the activity limitations they  
47  
48 experienced, and their perceptions of other people's beliefs towards their condition.  
49  
50  
51  
52  
53  
54  
55

56  
57 The two previous systematic reviews synthesising qualitative data have limitations as they  
58  
59 did not consider the experience of knee osteoarthritis separately to the experience of non-  
60

1  
2  
3 osteoarthritic related conditions (e.g. Wride et al(17)), and to the experience of hip  
4  
5 osteoarthritis (e.g. Smith et al(16)). Empirical evidence suggests hip and knee osteoarthritis  
6  
7 are distinct conditions that impact people in different ways(18). In addition, neither  
8  
9 review(16, 17) looked at the perspectives of carers. Those in the immediate social  
10  
11 environment may exert an influence on how an individual copes with their condition. In the  
12  
13 case of knee osteoarthritis, family members and significant others often adopt the role of  
14  
15 carer. By investigating the perceptions and experiences of both patients and carers, health  
16  
17 professionals can gain a greater understanding of how living with knee osteoarthritis effects  
18  
19 their lives, which may lead to improved management of people with knee osteoarthritis.  
20  
21  
22  
23  
24 Therefore, the aim of this study was to systematically review the qualitative literature on the  
25  
26 experience of living with knee osteoarthritis from the perspectives of patients and carers.  
27  
28

## 29 **Methods and analysis**

### 31 *Design*

32  
33 A systematic review of qualitative studies was conducted. The review was reported consistent  
34  
35 with the Enhancing Transparency in Reporting the Synthesis of Qualitative Research  
36  
37 (ENTREQ),(19). A review protocol was registered prospectively with PROSPERO  
38  
39 (registration number CRD42018108962 <https://www.crd.york.ac.uk/PROSPERO>).  
40  
41  
42  
43

### 44 *Patient and public involvement*

45  
46 Patients and public were not involved in the development of the research question, outcome  
47  
48 measures or research design.  
49  
50

### 51 *Search strategy*

52  
53 Five electronic data bases (CINAHL, Embase, Medline, Psychinfo, SPORTDiscus) were  
54  
55 searched from inception until October 2018. The search strategy comprised two key  
56  
57 concepts: knee osteoarthritis and qualitative research. For each concept, key words and  
58  
59  
60

1  
2  
3 MeSH terms were combined using the 'OR' operator and the results were combined using the  
4  
5 AND operator (Appendix). The search results were downloaded into bibliographic software  
6  
7 (Endnote version 18). Two reviewers independently reviewed the titles and abstracts  
8  
9 according to the selection criteria (Table 1). If eligibility was uncertain based on title and  
10  
11 abstract, the full-text of the study was obtained. Reference lists of included articles were  
12  
13 manually searched for additional relevant articles, and citation tracking of included articles  
14  
15 was completed using Google Scholar.  
16  
17

### 18 19 20 *Eligibility criteria*

21  
22 Studies reporting the experiences of people living with knee osteoarthritis, and their carers  
23  
24 were included. Studies that explored experiences of participation in specific interventions for  
25  
26 knee osteoarthritis, including perioperative management and attitudes about the decision to  
27  
28 proceed to total knee replacement were excluded as the focus of the review was on the lived  
29  
30 experience of knee osteoarthritis, and not about the response to treatment from receiving a  
31  
32 specific intervention (Table 1). Since the aim of our review was to explore the experience of  
33  
34 living with knee osteoarthritis, with a focus on the psychological and social dimensions, it  
35  
36 was decided not to include studies that explored perceptions about biological interventions  
37  
38 including surgery.  
39  
40  
41  
42  
43  
44  
45  
46  
47  
48  
49  
50  
51  
52  
53  
54  
55  
56  
57  
58  
59  
60

**Table 1:** Selection criteria

|                   | Inclusion criteria                                                                                                                                                                                                                                                            | Exclusion criteria                                                                                                                                                                                                                                                                                 |
|-------------------|-------------------------------------------------------------------------------------------------------------------------------------------------------------------------------------------------------------------------------------------------------------------------------|----------------------------------------------------------------------------------------------------------------------------------------------------------------------------------------------------------------------------------------------------------------------------------------------------|
| Design and report | <ul style="list-style-type: none"> <li>• Qualitative studies</li> <li>• Reports lived experience of knee osteoarthritis</li> <li>• Full text article published in peer-reviewed journal</li> <li>• Primary research</li> </ul>                                                | <ul style="list-style-type: none"> <li>• Questionnaires/surveys</li> <li>• Non-English language</li> <li>• Single case studies</li> <li>• Secondary analysis of qualitative data such as a systematic review</li> </ul>                                                                            |
| Participants      | <ul style="list-style-type: none"> <li>• Knee osteoarthritis</li> <li>• Perceptions of people diagnosed with knee osteoarthritis, and their carers</li> <li>• May include other conditions providing perceptions about knee osteoarthritis are reported separately</li> </ul> | <ul style="list-style-type: none"> <li>• Participants not identified as having knee osteoarthritis (e.g. knee pain, anterior cruciate ligament injury)</li> </ul>                                                                                                                                  |
| Interventions     | <ul style="list-style-type: none"> <li>• No intervention</li> <li>• May include studies exploring perceptions about management, such as knee replacement, provided experiences about living with knee osteoarthritis are reported separately</li> </ul>                       | <ul style="list-style-type: none"> <li>• Explored experiences of patients having participated in interventions</li> <li>• Explored experiences about perioperative management of knee replacement</li> <li>• Explored attitudes about the decision to proceed to total knee replacement</li> </ul> |



### *Methodological quality of the included studies*

The Critical Appraisal Skills Programme (CASP) checklist was used to assess methodological quality of the included studies(20). The CASP checklist includes 10 questions in 3 sections about the validity of the results (questions 1-6), ethical considerations, trustworthiness and clarity of results (questions 7-9), and the value of the results (question 10). Two reviewers (JW, SB) independently answered each question as “yes”, “no” or “can’t tell”, by reading the decision rules and instructions on how to interpret checklist criteria. Discrepancies between reviewers were discussed with a third reviewer (NT) until consensus was reached with the overall judgment scored as yes or no. The CASP checklist has been used in other qualitative systematic reviews in musculoskeletal research(21, 22).

### *Data collection process*

Data were extracted from each study on participant age, sex, disease severity and body mass index, where available. Data were also extracted on the study design including sample size, data collection method (e.g. interview or focus group), and qualitative framework informing the analysis. From the results section of each included paper, we extracted the main themes and subthemes as outlined below.

### *Data analysis*

Data were analysed using a three-stage approach adapted from Sandelowski and Barroso(23). In stage one, the results sections of each paper including direct quotations were read and re-read so the authors familiarised themselves with the content, prior to extracting main themes and subthemes. Themes and subthemes were then extracted and assigned descriptive codes using an inductive process. In stage two, the identified codes were then reviewed and codes were grouped together according to their topical similarity. In stage three, these groupings of codes were subsequently organised into themes and sub-themes in a process of thematic

1  
2  
3 analysis. To help understand the relative importance of the emergent themes and subthemes  
4 relative to each other, and consistent with content analysis methods, the number of studies  
5 that identified each theme was counted. The process of data extraction, initial coding,  
6  
7  
8  
9  
10  
11  
12  
13  
14  
15  
16  
17  
18  
19  
20  
21  
22  
23  
24  
25  
26  
27  
28  
29  
30  
31  
32  
33  
34  
35  
36  
37  
38  
39  
40  
41  
42  
43  
44  
45  
46  
47  
48  
49  
50  
51  
52  
53  
54  
55  
56  
57  
58  
59  
60

analysis. To help understand the relative importance of the emergent themes and subthemes relative to each other, and consistent with content analysis methods, the number of studies that identified each theme was counted. The process of data extraction, initial coding, grouping of codes, and identification of emergent themes and subthemes was completed by one researcher (NS). The data analysis process was subsequently checked independently by two other researchers (JW, NT) before the final themes and subthemes were confirmed by the research team.

## Results

### *Study selection*

The search strategy yielded 720 articles. After screening the titles and abstracts of these articles, 42 underwent full text review. Sixteen articles were excluded after full text review resulting in a final library of 26 articles (Figure 1). The most common reasons for exclusion were that articles were abstracts, and the results of knee osteoarthritis were not reported separately from osteoarthritis at other joints. The 26 included articles reported data from 21 studies (Table 2) on the experience of living with knee osteoarthritis from the perspectives of people themselves (n=20) or their carers (n=1).

### *Methodological quality of included studies*

All studies had a clear rationale for using qualitative methods, used appropriate qualitative designs, and included explicit statements of findings that were considered high value. Two studies did not report approval from an ethics committee(24, 25) and four studies reported insufficient details about data analysis reducing the trustworthiness of the results(24-27). Only two of the 21 studies adequately reported the relationship between the researcher and the participant(28, 29). A pre-existing relationship between the participant and researcher

1  
2  
3 increases the risk of social desirability(30), whereby there is the tendency of the participants  
4 to answer questions in a manner that will be viewed favourably by the researchers (Table 3).  
5  
6

7  
8 *Study participant characteristics*  
9

10  
11 The 21 studies included 665 people with knee osteoarthritis (71% women; mean age 65  
12 years, age range 25 to 87) and 28 carers of people with knee osteoarthritis (46% women;  
13 mean age 48 years) (Table 2). The studies were conducted in Asia (n=6), North America  
14 (n=6), Europe (n=8) and New Zealand (n=1) and 15 of the 21 studies were published since  
15 2011. Participants' comorbidities as described in 6 studies included diabetes,  
16 depression/anxiety, polyarthritis, hypertension, heart disease, haemophilia, silicosis, vascular  
17 problems, cancer, gout, osteoarthritis in other joints and multiple knee surgeries. Participants  
18 in 9 studies self-assessed their pain severity at the time of their participation as mild to  
19 severe(25, 27, 31-37), and participants in 4 studies had severe osteoarthritis and were  
20 awaiting total knee replacement(29, 38-40). Thirteen studies provided details on participant  
21 employment status; the majority of participants were retired or not working, except for 3  
22 studies(28, 35, 41) in which the majority of participants were employed at the time of the  
23 study.  
24  
25  
26  
27  
28  
29  
30  
31  
32  
33  
34  
35  
36  
37  
38  
39  
40  
41  
42  
43  
44  
45  
46  
47  
48  
49  
50  
51  
52  
53  
54  
55  
56  
57  
58  
59  
60

**Table 2:** Characteristics of included studies of experiences of living with knee osteoarthritis

| Study                                                     | Country   | Population                                                                         | Demographics<br>(N, age, sex, BMI)    | Method:<br>Framework/analysis                                      | Sampling    | Data collection                           | Research questions                                                                                                                                                                                       |
|-----------------------------------------------------------|-----------|------------------------------------------------------------------------------------|---------------------------------------|--------------------------------------------------------------------|-------------|-------------------------------------------|----------------------------------------------------------------------------------------------------------------------------------------------------------------------------------------------------------|
| Alami <i>et al.</i> , 2011                                | France    | Knee osteoarthritis                                                                | N=81<br>71% women,                    | Descriptive<br>-Inductive                                          | Purposive   | Individual interviews<br>-semi-structured | Explore views of patients about management of knee osteoarthritis                                                                                                                                        |
| Ahmad <i>et al.</i> , 2018                                | Malaysia  | Knee osteoarthritis                                                                | N=12<br>Mean age 67 yrs<br>67% women  | Thematic analysis                                                  | Purposive   | Individual interviews<br>-in-depth        | Explore perspectives of patients with knee OA mainly about pain experiences, its impact, effects of physiotherapy and their personal expectation                                                         |
| Al-Taiar <i>et al.</i> , 2013                             | Kuwait    | Severe knee osteoarthritis<br>-Kuwaiti women waitlisted for total knee replacement | N=39<br>Mean age 62 yrs<br>100% women | Thematic analysis                                                  | Convenience | Focus groups                              | Explore the pain experience and mobility limitation as well as the patient's decision making process to undertake total knee replacement among women with knee pain in the waiting list for surgery      |
| Carmona-Teres <i>et al.</i> , 2017                        | Spain     | Knee osteoarthritis<br>-symptomatic                                                | N=10<br>Mean age 70 yrs,<br>70% women | Content thematic analysis based on Lazarus stress model categories | Theoretical | Individual interviews<br>-semi-structured | Understand experiences, perceptions, cognitive evaluation, values, emotions, beliefs and coping strategies of people with knee osteoarthritis                                                            |
| Chan and Chan, 2011                                       | Hong Kong | Knee osteoarthritis<br>-mild to very severe                                        | N=20<br>Mean age 57 yrs,<br>65% women | Grounded theory                                                    | Convenience | Individual interviews<br>-semi-structured | Evaluate influence of different pain patterns on quality of life Investigate coping strategies                                                                                                           |
| Clarke <i>et al.</i> , 2014<br>Pouli <i>et al.</i> , 2014 | UK        | Knee osteoarthritis<br>-symptomatic                                                | N=24<br>Mean age 62 yrs,<br>71% women | Descriptive thematic analysis                                      | Purposive   | Individual interviews<br>-semi-structured | Explore participant's experience of living with knee osteoarthritis and their beliefs about knee osteoarthritis and its treatment                                                                        |
| Darlow <i>et al.</i> , 2018                               | NZ        | Knee osteoarthritis                                                                | N=13<br>Age range 50-84<br>54% women  | Interpretative description                                         | Purposive   | Individual interviews<br>-semi-structured | Explore the beliefs of people with knee osteoarthritis about the disease, how these beliefs had formed and what impact these beliefs had on activity participation, health behaviour and self-management |

1  
2  
3  
4  
5  
6  
7  
8  
9  
10  
11  
12  
13  
14  
15  
16  
17  
18  
19  
20  
21  
22  
23  
24  
25  
26  
27  
28  
29  
30  
31  
32  
33  
34  
35  
36  
37  
38  
39  
40  
41  
42  
43  
44  
45  
46

|                                           |        |                                                                         |                                          |                                                             |                                                                                  |                                                                                |                                                                                                                                                                                                    |
|-------------------------------------------|--------|-------------------------------------------------------------------------|------------------------------------------|-------------------------------------------------------------|----------------------------------------------------------------------------------|--------------------------------------------------------------------------------|----------------------------------------------------------------------------------------------------------------------------------------------------------------------------------------------------|
| Figaro <i>et al.</i> , 2004               | US     | Knee osteoarthritis<br>-not actively seeking total knee replacement     | N=94<br>Mean age 71 yrs<br>84% women     | Content analysis<br><br>Constant comparative methods        | Purposive<br><br>Network, convenience and snowball sampling to extend the sample | Structured field interviews                                                    | Explore older urban Blacks with knee osteoarthritis to determine their preferences and expectations of total knee replacement                                                                      |
| Hall <i>et al.</i> , 2008                 | Canada | Unilateral knee osteoarthritis<br>-scheduled for total knee replacement | N=15<br>Mean age 67 yrs<br>40% women     | Grounded theory                                             | Purposive                                                                        | Individual interviews<br>-semi-structured                                      | Explore views of total knee replacement and the role of physiotherapy                                                                                                                              |
| Hendry <i>et al.</i> , 2006               | UK     | Knee osteoarthritis<br>-mild to severe symptoms                         | N=22<br>Age range 52-86 yrs<br>73% women | Conceptual Framework                                        | Convenience                                                                      | Individual interviews<br>Focus Groups (N=6)                                    | Explore the views of primary care patients with knee osteoarthritis towards exercise, and explore factors that determine acceptability and motivation to exercise, and barriers that limit its use |
| Hsu <i>et al.</i> , 2015                  | Taiwan | Family carers of people with knee osteoarthritis                        | N=28<br>Mean age 48 yrs,<br>46% women    | Descriptive content analysis                                | Convenience                                                                      | Individual interviews<br>-semi-structured                                      | Explore primary caregivers' perceptions of their older relatives' knee osteoarthritis pain and management                                                                                          |
| Keysor <i>et al.</i> , 1998               | USA    | Knee osteoarthritis<br>-presence of functional limitations              | N=4<br>Age range 25-43 yrs,<br>75% women | Van Kaam method of phenomenologic data analysis             | Purposive                                                                        | Individual interviews<br>-semi structured (each participant interviewed twice) | Understand the experience of living with osteoarthritis as young and middle-aged adults                                                                                                            |
| Kao and Tsai, 2012, 2013                  | Taiwan | Knee osteoarthritis<br>-symptomatic                                     | N=17<br>Mean age 50 yrs,<br>82% women    | Constant comparison                                         | Purposive                                                                        | Individual interviews<br>-semi structured                                      | Understand the living and illness experiences of middle-aged adults with early knee osteoarthritis                                                                                                 |
| MacKay <i>et al.</i> , 2016, 2014a, 2014b | Canada | Knee osteoarthritis<br>-moderately symptomatic                          | N=51<br>Median age 49 yrs,<br>61% women  | Constructivist grounded Theory/ constant comparative method | Purposive                                                                        | Focus groups<br>Individual interviews<br>-semi-structured                      | Explore the meaning and perceived consequences of knee symptoms                                                                                                                                    |

|                                                      |           |                                                               |                                            |                                      |             |                                                      |                                                                                                                                                                          |
|------------------------------------------------------|-----------|---------------------------------------------------------------|--------------------------------------------|--------------------------------------|-------------|------------------------------------------------------|--------------------------------------------------------------------------------------------------------------------------------------------------------------------------|
| Maly and Krupa, 2007                                 | Canada    | Knee osteoarthritis                                           | N=3<br>Age range 62-87 yrs,<br>67% women   | Descriptive phenomenology            | Convenience | Individual interviews<br>-semi structured            | Understand the experience of living with knee osteoarthritis in older adults                                                                                             |
| Man <i>et al.</i> , 2017                             | US        | Knee osteoarthritis<br>-waitlisted for total knee replacement | N=8<br>Age range 46-80 yrs<br>50% women    | Thematic analysis                    | Purposive   | Individual interviews<br>-semi-structured            | Explore the meaning and importance of occupational changes experienced by individuals during the pre- total knee replacement period                                      |
| Morden <i>et al.</i> 2011,<br>Ong <i>et al.</i> 2011 | UK        | Knee osteoarthritis<br>-moderate to severe                    | N=22<br>Age range 50-75+ yrs,<br>59% women | Constant comparison                  | Purposive   | Individual interviews<br>-in-depth<br>Diaries        | Explore the meaning and enactment of self-management in everyday life                                                                                                    |
| Nyvang <i>et al.</i> , 2016                          | Sweden    | Knee osteoarthritis<br>-scheduled for total knee replacement  | N=12<br>Mean age 66 yrs<br>58% women       | Thematic analysis                    | Purposive   | Individual interviews<br>-semi-structured            | Explore patients' experiences of living with knee osteoarthritis when scheduled for total knee replacement and further their expectations for future life after surgery. |
| Tallon <i>et al.</i> , 2000                          | UK        | Knee osteoarthritis<br>-mild to moderate                      | N=7                                        | Content analysis                     | Convenience | Focus group                                          | Explore perception of treatment preferences                                                                                                                              |
| Victor <i>et al.</i> , 2004                          | UK        | Knee osteoarthritis                                           | N=170<br>Mean age 63 yrs,<br>73% women     | Content analysis                     | Convenience | Individual interviews<br>Group discussion<br>Diaries | Explore meaning of osteoarthritis for those receiving health promotion                                                                                                   |
| Xie <i>et al.</i> , 2006                             | Singapore | Knee osteoarthritis<br>-symptomatic                           | N=41<br>Mean age 64 yrs,<br>66% women      | Grounded theory/<br>Content analysis | Purposive   | Focus groups                                         | Determine health-related quality of life domains affected by knee osteoarthritis. and identify ethnic variations in the importance of these domains                      |

Yrs = Years

**Table 3:** Critical Appraisal Skills Programme (CASP) assessment

| Study name                                                 | 1. Was there a clear statement of the aims of the research? | 2. Is a qualitative methodology appropriate? | 3. Was the research design appropriate to address the aims of the research? | 4. Was the recruitment strategy appropriate to the aims of the research? | 5. Was the data collected in a way that addressed the research issue? | 6. Has the relationship between researcher and participant been adequately considered? | 7. Have ethical issues been taken into consideration? | 8. Was the data analysis sufficiently rigorous? | 9. Is there a clear statement of findings? | 10. How valuable is the research? |
|------------------------------------------------------------|-------------------------------------------------------------|----------------------------------------------|-----------------------------------------------------------------------------|--------------------------------------------------------------------------|-----------------------------------------------------------------------|----------------------------------------------------------------------------------------|-------------------------------------------------------|-------------------------------------------------|--------------------------------------------|-----------------------------------|
| Alami <i>et al.</i> , 2011                                 | Y                                                           | Y                                            | Y                                                                           | Y                                                                        | N                                                                     | N                                                                                      | Y                                                     | Y                                               | Y                                          | Y                                 |
| Ahmed <i>et al.</i> , 2018                                 | Y                                                           | Y                                            | Y                                                                           | Y                                                                        | Y                                                                     | N                                                                                      | Y                                                     | N                                               | Y                                          | Y                                 |
| Al-Taiar <i>et al.</i> , 2013                              | Y                                                           | Y                                            | Y                                                                           | Y                                                                        | Y                                                                     | N                                                                                      | Y                                                     | Y                                               | Y                                          | Y                                 |
| Carmona-Teres <i>et al.</i> , 2017                         | Y                                                           | Y                                            | Y                                                                           | Y                                                                        | Y                                                                     | N                                                                                      | Y                                                     | Y                                               | Y                                          | Y                                 |
| Chan and Chan., 2011                                       | Y                                                           | Y                                            | Y                                                                           | Y                                                                        | Y                                                                     | N                                                                                      | Y                                                     | N                                               | Y                                          | Y                                 |
| Clarke <i>et al.</i> , 2014 and Pouli <i>et al.</i> , 2014 | Y                                                           | Y                                            | Y                                                                           | Y                                                                        | Y                                                                     | N                                                                                      | Y                                                     | Y                                               | Y                                          | Y                                 |
| Darlow <i>et al.</i> , 2018                                | Y                                                           | Y                                            | Y                                                                           | Y                                                                        | Y                                                                     | Y                                                                                      | Y                                                     | Y                                               | Y                                          | Y                                 |
| Figaro <i>et al.</i> , 2004                                | Y                                                           | Y                                            | Y                                                                           | Y                                                                        | Y                                                                     | N                                                                                      | Y                                                     | Y                                               | Y                                          | Y                                 |
| Hall <i>et al.</i> , 2008                                  | Y                                                           | Y                                            | Y                                                                           | Y                                                                        | Y                                                                     | Y                                                                                      | Y                                                     | Y                                               | Y                                          | Y                                 |

|    |                                          |   |   |   |   |   |   |   |   |   |   |
|----|------------------------------------------|---|---|---|---|---|---|---|---|---|---|
| 1  |                                          |   |   |   |   |   |   |   |   |   |   |
| 2  |                                          |   |   |   |   |   |   |   |   |   |   |
| 3  |                                          |   |   |   |   |   |   |   |   |   |   |
| 4  | Hendry <i>et al.</i> , 2006              | Y | Y | Y | Y | Y | N | Y | Y | Y | Y |
| 5  |                                          |   |   |   |   |   |   |   |   |   |   |
| 6  | Hsu <i>et al.</i> , 2015                 | Y | Y | Y | Y | Y | N | Y | Y | Y | Y |
| 7  |                                          |   |   |   |   |   |   |   |   |   |   |
| 8  | Kao <i>et al.</i> , 2012, 2014           | Y | Y | Y | Y | Y | N | Y | Y | Y | Y |
| 9  |                                          |   |   |   |   |   |   |   |   |   |   |
| 10 |                                          |   |   |   |   |   |   |   |   |   |   |
| 11 | Keysor <i>et al.</i> , 1998              | Y | Y | Y | Y | Y | N | Y | Y | Y | Y |
| 12 |                                          |   |   |   |   |   |   |   |   |   |   |
| 13 | Mackay <i>et al.</i> , 2016, 2014a.      | Y | Y | Y | Y | Y | N | Y | Y | Y | Y |
| 14 |                                          |   |   |   |   |   |   |   |   |   |   |
| 15 | 2014b                                    |   |   |   |   |   |   |   |   |   |   |
| 16 |                                          |   |   |   |   |   |   |   |   |   |   |
| 17 |                                          |   |   |   |   |   |   |   |   |   |   |
| 18 | Maly and Krupa, 2007                     | Y | Y | Y | Y | Y | N | Y | Y | Y | Y |
| 19 |                                          |   |   |   |   |   |   |   |   |   |   |
| 20 | Man <i>et al.</i> , 2017                 | Y | Y | Y | Y | Y | N | Y | Y | Y | Y |
| 21 |                                          |   |   |   |   |   |   |   |   |   |   |
| 22 |                                          |   |   |   |   |   |   |   |   |   |   |
| 23 | Morden <i>et al.</i> 2011, Ong <i>et</i> | Y | Y | Y | Y | Y | N | Y | Y | Y | Y |
| 24 | <i>al.</i> 2011                          |   |   |   |   |   |   |   |   |   |   |
| 25 |                                          |   |   |   |   |   |   |   |   |   |   |
| 26 |                                          |   |   |   |   |   |   |   |   |   |   |
| 27 | Nyvang <i>et al.</i> 2016                | Y | Y | Y | Y | Y | N | Y | Y | Y | Y |
| 28 |                                          |   |   |   |   |   |   |   |   |   |   |
| 29 | Tallon <i>et al.</i> 2000                | Y | Y | Y | N | Y | N | N | Y | Y | Y |
| 30 |                                          |   |   |   |   |   |   |   |   |   |   |
| 31 |                                          |   |   |   |   |   |   |   |   |   |   |
| 32 | Victor <i>et al.</i> 2004                | Y | Y | Y | Y | Y | N | N | N | Y | Y |
| 33 |                                          |   |   |   |   |   |   |   |   |   |   |
| 34 | Xie <i>et al.</i> 2006                   | Y | Y | Y | Y | Y | N | Y | Y | Y | Y |
| 35 |                                          |   |   |   |   |   |   |   |   |   |   |
| 36 |                                          |   |   |   |   |   |   |   |   |   |   |

---

Y = yes, N = no



1  
2  
3 *Major themes reported by included studies*  
4  
5

6 Seven major themes emerged from the data: (1) The perceived causes of knee osteoarthritis  
7 are multifactorial and lead to structural damage to the knee and deterioration over time; (2)  
8 Pain and how to manage it predominates the lived experience; (3) Knee osteoarthritis impacts  
9 activity and participation; (4) Knee osteoarthritis has a social impact; (5) Knee osteoarthritis  
10 has an emotional impact; (6) Interactions with health professionals can be positive or  
11 negative; and (7) Knee osteoarthritis leads to life adjustments. Themes were consistent  
12 between studies that included people with severe osteoarthritis and mild to moderate  
13 osteoarthritis. The study including caregivers (family members of the participants from one  
14 trial), captured 6 of the 7 major themes, with no new themes identified by caregivers.  
15  
16  
17  
18  
19  
20  
21  
22  
23  
24  
25  
26

27 *(1) The perceived causes of knee osteoarthritis are multifactorial and lead to structural*  
28 *damage to the knee and deterioration over time*  
29  
30  
31

32 Thirteen studies reported what participants perceived the causes of knee osteoarthritis  
33 were(24-28, 32-35, 37, 38, 42, 43). Perceived cause of knee osteoarthritis included internal  
34 factors (such as being overweight, family history of osteoarthritis, ageing, working in  
35 occupations requiring heavy manual work such as extensive kneeling or lifting, past sporting  
36 activities, and menopause); and external factors (such as trauma and the weather).  
37  
38  
39  
40  
41  
42  
43  
44  
45  
46  
47  
48  
49  
50  
51  
52  
53  
54  
55  
56  
57  
58  
59  
60  
Participants perceived knee osteoarthritis as preventable or partially attributable to actions or  
incidents that were modifiable (e.g. pushing too far or knee injury) had they changed their  
behaviour earlier in life. Participants in 4 studies expressed strong beliefs and concerns about  
their knee osteoarthritis being caused by structural deterioration(25, 28, 33, 34) using  
language such as ‘bone on bone’ with the joint worn away by movement. Carers of people  
with knee osteoarthritis attributed the cause of their relative’s knee osteoarthritis to ageing,  
working too hard or to unknown causes (42).

1  
2  
3 The prognosis of knee osteoarthritis was discussed by participants in 6 studies(26, 28, 32-35).  
4  
5 Participants believed their symptoms would get worse over time as knee osteoarthritis was ‘a  
6  
7 progressive degenerative disease’ and could not be ‘cured’. However, participants in one  
8  
9 study(35) also felt they could halt or slow the progression of their symptoms through diet and  
10  
11 exercise.  
12  
13

### 14 15 *(2) Pain and how to manage it predominates the lived experience* 16

17  
18 The participants’ experience of pain and its management emerged as a theme in 19  
19  
20 studies(25-29, 31-33, 35-45). Pain was described by participants as the predominant  
21  
22 ‘omnipresent’ feature of knee osteoarthritis. Pain was perceived to interrupt and deter daily  
23  
24 activities such as walking, to make people less confident in their bodies, and to slow people  
25  
26 down. Participants in one study described two distinct patterns of pain: ‘mechanical’ pain  
27  
28 described as ‘sharp’ pain related to discrete movements or activities, and ‘inflammatory’ pain  
29  
30 described as a ‘burning’ pain which was more unpredictable and associated with the weather  
31  
32 or prolonged activity(27). Pain was perceived as insurmountable when there was no  
33  
34 foreseeable end to it and made some participants feel ‘old’. Carers reported their relatives  
35  
36 with knee osteoarthritis rarely mentioned pain until they needed help(42). Participants  
37  
38 reported managing their pain with medication but that this was not always a satisfactory  
39  
40 strategy due to feelings of dependence, undesirable side-effects, and only partial relief from  
41  
42 symptoms. Other pain management strategies described were activity-related (including  
43  
44 exercise, avoidance of certain activities, brief rest, pacing, and physiotherapy), psychological-  
45  
46 related (having a positive life philosophy, humour, continuing to engage in pleasurable  
47  
48 activities), passive treatment modalities (including ice, heat, massage, Chinese traditional  
49  
50 medicine) and weight loss. Some believed joint replacement was inevitable and the only real  
51  
52 solution for their pain(25, 28). Similarly, carers of relatives with knee osteoarthritis believed  
53  
54 the most promising method to reduce pain was a knee replacement, and often persuaded their  
55  
56  
57  
58  
59  
60

1  
2  
3 relatives to see a doctor about having surgery(42). In contrast, participants from one study  
4 preferred a natural solution only as they had a negative perception of surgery and saw it as a  
5 last resort(43).  
6  
7  
8

9  
10  
11 *(3) Knee osteoarthritis impacts activity and participation*  
12

13 Participants in 16 studies reported functional limitations due to their knee osteoarthritis  
14 particularly mobility restrictions(25-29, 31, 32, 35-42, 45). Participants predominantly  
15 reported limitations in movements involving weight-bearing such as standing, stair climbing,  
16 squatting, carrying, lifting, kneeling, bending; limitations in self-care activities such as  
17 dressing, toileting, sleeping, cooking; limitations in leisure pursuits such as walking,  
18 gardening, sport, and other forms of exercise, and a fear of falling. Living with knee  
19 osteoarthritis was reported by participants to reduce their physical activity and exercise, and  
20 to become sedentary. Participants described the impact on physical activities was associated  
21 with the severity of their knee osteoarthritis. The combined consequences of pain and  
22 functional limitations was an inability for some participants to participate in paid  
23 employment, or a reduction in work hours affecting household income, or other impacts on  
24 work such as requiring modifications, tiring easily, or being less efficient. For others, living  
25 with knee osteoarthritis meant a loss of independence, and a loss of sleep(28).  
26  
27  
28  
29  
30  
31  
32  
33  
34  
35  
36  
37  
38  
39  
40  
41  
42  
43

44 *(4) Knee osteoarthritis has a social impact*  
45

46 Participants in 10 studies felt their knee osteoarthritis had a substantial social impact(27, 29,  
47 34-36, 38-41, 45). It limited their ability to stay socially connected because of reduced  
48 participation in leisure activities and because of difficulties with taking public transport. For  
49 some participants, the inability to take part in socially-based physical activity, such as  
50 walking with friends or playing sport was the most difficult aspect of this condition.  
51 Participants described social isolation marked by doing fewer activities outside of home.  
52  
53  
54  
55  
56  
57  
58  
59  
60

1  
2  
3 Participants felt mobility limitations made it conspicuous to others that they had poor health.  
4  
5 Living with knee osteoarthritis reduced their enjoyment of activities, particularly when  
6  
7 travelling. Others described a change in their social relationships conveying that they related  
8  
9 more to older individuals with health problems. Participants also described the repercussions  
10  
11 of knee osteoarthritis on family life, reporting difficulties taking care of the family including  
12  
13 looking after grandchildren and playing with their children.  
14  
15

16  
17  
18 *(5) Knee osteoarthritis has an emotional impact*  
19

20 Thirteen studies reported data on the emotional impact participants said they experienced as a  
21  
22 result of having knee osteoarthritis(25-29, 31, 32, 35, 36, 40-42, 45). Living with knee  
23  
24 osteoarthritis was described as being ‘difficult’ and often described as having a negative  
25  
26 impact on the participant’s mood, resulting in feelings of loss, anxiety, inadequacy,  
27  
28 frustration, irritability, emotional distress, depression, embarrassment, fear for the future and  
29  
30 uncertainty of the outcomes of knee pain. Carers reported their relatives with knee  
31  
32 osteoarthritis could lose their temper easily when experiencing severe pain(42). Some  
33  
34 participants reported their mobility limitations in particular devalued their sense of self-worth  
35  
36 because mobility was integral to their identity. Living with knee osteoarthritis made them feel  
37  
38 like ‘a partial person’, ‘less valuable’ and losing their identity, since they had to give up  
39  
40 something that was part of their normal life. Other participants talked of a reduced sense of  
41  
42 control or of being ‘lost’ after being ‘told’ to eliminate athletic activities and change their  
43  
44 lifestyles. Other participants reported grieving for activities they could no longer take part in,  
45  
46 or their vision of ageing. Participants in one study(27) felt the unpredictability and  
47  
48 uncertainty of living with knee osteoarthritis caused the most stress. While participants in  
49  
50 another study(40) said they dreamed of regaining their previous level of physical activity,  
51  
52 their knee was a major barrier to achieving their dreams.  
53  
54  
55  
56  
57  
58  
59  
60

1  
2  
3 *(6) Interactions with health professionals can be positive or negative*  
4  
5

6 Eleven studies explored the interactions people with knee osteoarthritis described having with  
7 health professionals(24, 25, 31-33, 35, 41, 43-46). Participants said the impact of their  
8 diagnosis was a positive step towards successful management; although for people with low  
9 expectations of treatment, the impact of their diagnosis resulted in limited contact with health  
10 professionals. Participants who had positive interactions with health professionals described  
11 being listened to, being offered hope for the future, and being provided with  
12 recommendations for managing knee osteoarthritis including weight loss and exercise.  
13  
14 Participants who had negative experiences interacting with health professionals described  
15 their dissatisfaction with receiving limited information about their condition and the  
16 management options available including ways to avoid aggravating their condition, a sense of  
17 not being listened to, not being given sufficient attention or not understanding the information  
18 provided to them. For example, in one study(35) participants recounted how their symptoms  
19 were viewed by health professionals as something that could not be changed, which they ‘just  
20 had to live with’ or were dismissed as an inevitable part of ageing.  
21  
22

23  
24  
25  
26  
27  
28  
29  
30  
31  
32  
33  
34  
35  
36  
37  
38 *(7) Knee osteoarthritis leads to life adjustments*  
39

40  
41 Fourteen studies(25, 27-29, 31, 32, 34, 35, 37, 39-42, 45) reported participants’ descriptions  
42 of adjusting to having knee osteoarthritis in terms of role changes or modifications,  
43 ownership of their health management, awareness of their condition and developing coping  
44 strategies. Participants described taking measures to alleviate their symptoms and protect  
45 their knee joint including lifestyle adjustments by keeping active and controlling their weight,  
46 adapting their work, modifying activities or postures to manage everyday routines (e.g.  
47 climbing stair less frequently and looking for escalators, not carrying heavy things, planning  
48 ahead, looking for places to sit, avoiding situations whereby pain would be intolerable and  
49 avoiding public transport) and seeking out health-related information. In one study(28),  
50  
51  
52  
53  
54  
55  
56  
57  
58  
59  
60

1  
2  
3 participants described living with knee osteoarthritis as a balancing act recognising the health  
4  
5 benefits from being physically active as well as beliefs about further joint deterioration and  
6  
7 pain. Two studies(29, 39) described a ‘tipping point’ whereby participants arrived at the point  
8  
9 where they were giving up all their enjoyable activities with an extensive feeling of loss, and  
10  
11 felt their best option was a knee replacement.  
12  
13

## 14 15 **Discussion**

16  
17 This systematic review provides insights into the experience of living with knee osteoarthritis  
18  
19 as described by the seven emergent themes. While the experience of persistent pain and  
20  
21 disability were the main features of everyday living with knee osteoarthritis, psychological  
22  
23 and social factors such as emotional distress, loss of social contact, and fear for the future  
24  
25 were commonly expressed concerns of the participants. Other common views were the  
26  
27 perceptions of knee osteoarthritis as an inevitable part of ageing, attributing their  
28  
29 osteoarthritic knee to ‘wear and tear’, and finding ways to adjust their lives until they reach  
30  
31 the ‘tipping point’ characterised by a perceived need for a knee replacement. A theme  
32  
33 highlighted was unsatisfying relationships between people with knee osteoarthritis and  
34  
35 healthcare professionals if there was limited information about the knee osteoarthritis and  
36  
37 effective management options. Importantly, patient and health professional interactions were  
38  
39 also perceived to provide a positive step towards effective management, particularly when  
40  
41 health professionals listen to their patients, convey hope for the future, and provide  
42  
43 recommendations for managing knee osteoarthritis.  
44  
45  
46  
47  
48  
49

50 This review, comprising data from 21 studies involving 665 people with knee osteoarthritis  
51  
52 and 28 carers, adds to the literature by highlighting the magnitude of the psychosocial impact  
53  
54 of living with knee osteoarthritis that permeates all aspects of life. A previous systematic  
55  
56 review of the experience of hip and knee osteoarthritis focussed on the functional impacts of  
57  
58 osteoarthritis, as well as people’s lack of understanding and the stigma of their disease(16).  
59  
60

1  
2  
3 One small previous review of 9 studies focussed on the lived experience of knee pain, but did  
4 not limit this to osteoarthritis(17). While the assessment of the lived experience of a health  
5 condition should be disease-specific(47), the finding by Wride et al. that ‘knee pain affects  
6 every aspect of life, redefining what people are able to do, who they do it with and how they  
7 do it’ complements our findings among people with knee osteoarthritis.  
8  
9

10  
11  
12  
13  
14  
15 The anxiety, depression and feeling of hopelessness that we identified in our review only  
16 recently received attention in published clinical practice guidelines. For example, clinical  
17 practice guidelines for management of knee and hip osteoarthritis(48, 49) emphasise the  
18 importance of a holistic assessment to ascertain the impact of osteoarthritis on the whole  
19 person. This includes specific recommendations for a psychosocial evaluation to identify  
20 unique factors that may affect a person’s quality of life and participation in usual activities,  
21 and to embed patient-centred care principles in the management of patients with knee  
22 osteoarthritis. Patient-centred care encourages patient participation in decision making and  
23 communication with patients about their management options. Hence, offering a  
24 psychological intervention such as cognitive behavioural therapy(13) may be important to  
25 improve the lived experience and self-management of osteoarthritis. Recent Australian  
26 clinical practice guidelines conditionally recommend offering cognitive behavioural  
27 interventions (e.g. pain coping skills training) delivered by trained health professionals to  
28 people with knee osteoarthritis presenting with psychological impairments(48). Combined  
29 with exercise, the guidelines suggest these interventions may improve pain, self-efficacy,  
30 pain coping, depression, and anxiety(48).  
31  
32  
33  
34  
35  
36  
37  
38  
39  
40  
41  
42  
43  
44  
45  
46  
47  
48  
49  
50

51  
52 Psychological and social factors such as emotional distress, concerns about disability and  
53 learning to live with pain have been identified among people living with other chronic  
54 musculoskeletal pain conditions(50, 51). Some of the experiences of living with knee  
55 osteoarthritis we identified, such as the perception among the participants in the included  
56  
57  
58  
59  
60

1  
2  
3 studies that their condition was an inevitable part of ageing, the perceived poor prognosis due  
4 to the ‘progressive degenerative disease’, and the pre-occupation with the existing damage to  
5 their joint and their perceived need for surgery have also been recognised in people with low  
6 back pain(52, 53). An explanation for the perception of ‘damage’ for people with knee  
7 osteoarthritis is likely to have been influenced by the results of imaging as well as the  
8 messages people receive from their health professionals(54). This highlights the importance  
9 that health professionals not only focus on reducing joint-related pain and improving  
10 function, but to also include strategies to dispel patient misconceptions about knee  
11 osteoarthritis(55). Strategies may include providing education that osteoarthritis is not a  
12 ‘wear and tear’ disease, that it does not necessarily worsen with ageing and that people can  
13 remain healthy and active with osteoarthritis(33, 56). One strategy could be to apply audit  
14 and feedback which has been used to change clinician behaviour in the management of other  
15 clinical groups(57). Audit and feedback to health professionals could be applied to improve  
16 the education and language used to describe osteoarthritis, to overcome and dispel patient  
17 misconceptions as well as help patients participate in decisions about their management(58).  
18 It may also be important that carers are invited to be involved in conversations and education  
19 sessions with health professionals. This approach could potentially dispel carer  
20 misconceptions about the causes of osteoarthritis and its management, may be empowering  
21 for family members(59), and may lead to improved patient adherence to treatment and better  
22 outcomes.

23  
24  
25  
26  
27  
28  
29  
30  
31  
32  
33  
34  
35  
36  
37  
38  
39  
40  
41  
42  
43  
44  
45  
46  
47  
48  
49  
50  
51  
52  
53  
54  
55  
56  
57  
58  
59  
60  
The overall findings highlight the importance of equipping patients and carers with  
information and self-management strategies to reduce the impact of knee osteoarthritis on  
their lives, beyond simply providing information about osteoarthritis. In particular to improve  
their psychosocial wellbeing, by reducing pain, maintaining function, increasing social and  
physical activity participation, helping patients to remain in employment, and achieve



1  
2  
3 optimal mental health. For example, one option to address patients' harmful beliefs and  
4 attitudes towards pain and damage is to address the negative or mistaken language and beliefs  
5 about their knee through education. Emphasising facts such as 'hurt does not equal harm' and  
6 'exercise is safe'(60) and dismissing myths such as 'exercise is damaging'(55) may be  
7 fundamental to alter people's negative attitudes and may be best combined with interventions  
8 such as exercise programs to potentially improve patients' overall perception of their knee.  
9  
10 Beliefs about a health condition are formed not only from personal experiences, but also from  
11 observing others and external sources of information such as the media. Thus, negative  
12 beliefs about knee osteoarthritis can predate the onset of the condition(61). Therefore, there  
13 may be a role for public health campaigns to dispel myths about knee osteoarthritis across  
14 society more broadly.

15  
16  
17  
18  
19  
20  
21  
22  
23  
24  
25  
26  
27  
28  
29 The main limitation of this systematic review was the exclusion of studies exploring patients'  
30 perceptions of interventions they received such as exercise or perioperative management for  
31 knee osteoarthritis. This was excluded because experiences in response to biological  
32 interventions would be expected to be different from the daily experience of living with knee  
33 osteoarthritis (the focus of this review), and should be the subject of further study. Only one  
34 study reported carer perceptions about living with knee osteoarthritis. Although the themes  
35 identified in this single study converged with 6 of the 7 themes, further enquiry may be  
36 required to confirm their perceptions. Further, given the pattern of recurring themes we  
37 identified, it is unlikely that the inclusion of subsequent studies would have substantially  
38 added to the themes we described in this review. Finally, exclusion of non-English language  
39 articles limits the generalizability as other cultures with other languages might have different  
40 perceptions of knee osteoarthritis.  
41  
42  
43  
44  
45  
46  
47  
48  
49  
50  
51  
52  
53  
54  
55  
56  
57  
58  
59  
60

## Conclusion

This review highlighted the value of taking patient attitudes and experiences into account, consistent with patient-centred care, when planning and implementing management options for people with knee osteoarthritis. These findings could inform clinical practice guidelines, to help clinicians better understand the lived experience of knee osteoarthritis, optimise the patient-clinician interaction, and provide insights into how patient education may be conducted. These findings could also lead to new research questions to address patients lived experience with knee osteoarthritis and interventions to target modifiable psychological and social factors.

## Contributors

JW: contributed to the conception and design of the review, acquisition of data, analysis and interpretation of data, contributed to the writing of the paper by revising it critically for important intellectual content and read and approved the manuscript. NT: contributed to the conception and design of the review, acquisition of data, analysis and interpretation of data, contributed to the writing of the paper by revising it critically for important intellectual content and read and approved the manuscript. SB: contributed to the conception and design of the review, acquisition of data, analysis and interpretation of data, contributed to the writing of the paper by revising it critically for important intellectual content and read and approved the manuscript. NS: contributed to the conception and design of the review, acquisition of data, analysis and interpretation of data, contributed to the writing of the paper by revising it critically for important intellectual content and read and approved the manuscript. Patients and public were not involved in this review.

### **Funding statement**

This research received no specific grant from any funding agency in the public, commercial or not-for-profit sectors.

### **Data sharing statement**

All data relevant to the study are included in the article or uploaded as supplementary information.

### **Competing interest statement**

All authors declare that they do not have any potential conflicts of interest.

### **References**

1. Glyn-Jones S, Palmer A, Agricola R, Price A, Vincent T, Weinans H, et al. Osteoarthritis. *Lancet*. 2015;386(9991):376-87.
2. Rayahin JE, Chmiel JS, Hayes KW, Almagor O, Belisle L, Chang AH, et al. Factors associated with pain experience outcome in knee osteoarthritis. *Arthrit Car Res* 2014;66(12):1828-35.
3. Holla JF, Sanchez-Ramirez DC, van der Leeden M, Ket JC, Roorda LD, Lems WF, et al. The avoidance model in knee and hip osteoarthritis: a systematic review of the evidence. *J Behav Med* 2014;37(6):1226-41.
4. Arendt-Nielsen L, Nie H, Laursen MB, Laursen BS, Madeleine P, Simonsen OHL, et al. Sensitization in patients with painful knee osteoarthritis. *Pain*. 2010;149(3):573-81.
5. McAlindon TE, Bannuru RR, Sullivan MC, Arden NK, Berenbaum F, Bierma-Zeinstra SM, et al. OARSI guidelines for the non-surgical management of knee osteoarthritis. *Osteoarthritis Cartilage*. 2014;22(3):363-88.

- 1  
2  
3 6. Briggs AM, Page CJ, Shaw BR, Bendrups A, Philip K, Cary B, et al. A model of care  
4 for osteoarthritis of the hip and knee: Development of a system-wide plan for the health  
5 sector in Victoria, Australia. *Healthcare Pol.* 2018;14(2):47-58.  
6  
7
- 8  
9  
10 7. Cubukcu D, Sarsan A, Alkan H. Relationships between pain, function and  
11 radiographic findings in osteoarthritis of the knee: a cross-sectional study. *Arthritis.* 2012:1-5.  
12  
13
- 14  
15 8. Mannion AF, Kampfen S, Munzinger U, Kramers-de Quervain I. The role of patient  
16 expectations in predicting outcome after total knee arthroplasty. *Arthritis Res Ther.*  
17  
18 2009;11(5):R139.  
19  
20
- 21  
22 9. Bourne RB, Chesworth BM, Davis AM, Mahomed NN, Charron KD. Patient  
23 satisfaction after total knee arthroplasty: who is satisfied and who is not? *Clin Orthop Relat*  
24  
25 *Res.* 2010;468(1):57-63.  
26  
27
- 28  
29 10. Hartvigsen J, Hancock MJ, Kongsted A, Louw Q, Ferreira ML, Genevay S, et al.  
30 What low back pain is and why we need to pay attention. *Lancet.* 2018;391(10137):2356-67.  
31  
32
- 33  
34 11. O'Sullivan PB, Caneiro JP, O'Keefe M, Smith A, Dankaerts W, Fersum K, et al.  
35 Cognitive functional therapy: an integrated behavioral approach for the targeted management  
36 of disabling low back pain. *Phys Ther.* 2018;98(5):408-23.  
37  
38
- 39  
40 12. Henschke N, Ostelo RW, van Tulder MW, Vlaeyen JW, Morley S, Assendelft WJ, et  
41 al. Behavioural treatment for chronic low-back pain. *Cochrane DB Syst Rev.* 2010(7).  
42  
43
- 44  
45 13. Zhang L, Fu T, Zhang Q, Yin R, Zhu L, He Y, et al. Effects of psychological  
46 interventions for patients with osteoarthritis: a systematic review and meta-analysis. *Psychol*  
47  
48 *Health Med.* 2018;23(1):1-17.  
49  
50
- 51  
52 14. Bennell KL, Ahamed Y, Jull G, Bryant C, Hunt MA, Forbes AB, et al. Physical  
53 therapist-delivered pain coping skills training and exercise for knee osteoarthritis:  
54  
55 randomized controlled trial. *Arthritis Car Res.* 2016;68(5):590-602.  
56  
57  
58  
59  
60

- 1  
2  
3 15. Thorne S. Toward methodological emancipation in applied health research. *Qual*  
4  
5 *Health Res.* 2011;21(4):443-53.  
6  
7  
8 16. Smith TO, Purdy R, Lister S, Salter C, Fleetcroft R, Conaghan P. Living with  
9  
10 osteoarthritis: A systematic review and meta-ethnography. *Scand J Rheumatol.*  
11  
12 2014;43(6):441-52.  
13  
14  
15 17. Wride JM, Bannigan K. 'If you can't help me, so help me God I will cut it off  
16  
17 myself...'The experience of living with knee pain: A qualitative meta-synthesis.  
18  
19 *Physiotherapy.* 2018;104:299-310.  
20  
21  
22 18. Hubertsson J, Turkiewicz A, Petersson I, Englund M. Understanding occupation, sick  
23  
24 leave and disability pension due to knee and hip osteoarthritis from a sex perspective.  
25  
26 *Arthritis Car Res.* 2017;69(2):226-33.  
27  
28  
29 19. Tong A, Flemming K, McInnes E, Oliver S, Craig J. Enhancing transparency in  
30  
31 reporting the synthesis of qualitative research: ENTREQ. *BMC Med Res Methodol.*  
32  
33 2012;12(1):181.  
34  
35  
36 20. CASP (systematic review). Available from URL: <http://www.casp-uk.net/>: Accessed  
37  
38 Nov 7, 2018; Critical Appraisal Skills Programme, 2018.  
39  
40  
41 21. Synnott A, O'Keeffe M, Bunzli S, Dankaerts W, O'Sullivan P, O'Sullivan K.  
42  
43 Physiotherapists may stigmatise or feel unprepared to treat people with low back pain and  
44  
45 psychosocial factors that influence recovery: a systematic review. *J Physiother.*  
46  
47 2015;61(2):68-76.  
48  
49  
50 22. Egerton T, Diamond LE, Buchbinder R, Bennell KL, Slade SC. A systematic review  
51  
52 and evidence synthesis of qualitative studies to identify primary care clinicians' barriers and  
53  
54 enablers to the management of osteoarthritis. *Osteoarthritis Cartilage.* 2017;25(5):625-38.  
55  
56  
57  
58  
59  
60

- 1  
2  
3 23. Sandelowski M, Barroso J. Handbook for synthesizing qualitative research. New  
4  
5 York. : Springer Publishing Company Inc; 2007.  
6  
7
- 8 24. Victor CR, Ross F, Axford J. Capturing lay perspectives in a randomized control trial  
9  
10 of a health promotion intervention for people with osteoarthritis of the knee. *J Eval Clin*  
11  
12 *Pract.* 2004;10(1):63-70.  
13  
14
- 15 25. Tallon D, Chard J, Dieppe P. Exploring the priorities of patients with osteoarthritis of  
16  
17 the knee. *Arthritis Car Res.* 2000;13(5):312-9.  
18  
19
- 20 26. Ahmad MA, Singh DKA, Qing CW, Rahman AB, Hendri M. Knee osteoarthritis and  
21  
22 its related issues: patients' perspective. *Malays J Health Sci.* 2018;16:171-7.  
23  
24
- 25 27. Chan KKW, Chan LWY. A qualitative study on patients with knee osteoarthritis to  
26  
27 evaluate the influence of different pain patterns on patients' quality of life and to find out  
28  
29 patients' interpretation and coping strategies for the disease. *Rheumatol Rep.* 2011;3(1):9-15.  
30  
31
- 32 28. Darlow B, Brown M, Thompson B, Hudson B, Grainger R, McKinlay E, et al. Living  
33  
34 with osteoarthritis is a balancing act: an exploration of patients' beliefs about knee pain.  
35  
36 *BMC Rheumatol.* 2018;2(1):15.  
37  
38
- 39 29. Hall M, Migay AM, Persad T, Smith J, Yoshida K, Kennedy D, et al. Individuals'  
40  
41 experience of living with osteoarthritis of the knee and perceptions of total knee arthroplasty.  
42  
43 *Physiother Theor Pr.* 2008;24(3):167-81.  
44  
45
- 46 30. Sitzia J, Wood N. Patient satisfaction: a review of issues and concepts. *Soc Sci Med.*  
47  
48 1997;45(12):1829-43.  
49  
50
- 51 31. Carmona-Teres V, Moix-Queralto J, Pujol-Ribera E, Lumillo-Gutierrez I, Mas X,  
52  
53 Batlle-Gualda E, et al. Understanding knee osteoarthritis from the patients' perspective: A  
54  
55 qualitative study. *BMC Musculoskelet Disord.* 2017;18(1):225.  
56  
57  
58  
59  
60

- 1  
2  
3  
4  
5  
6  
7  
8  
9  
10  
11  
12  
13  
14  
15  
16  
17  
18  
19  
20  
21  
22  
23  
24  
25  
26  
27  
28  
29  
30  
31  
32  
33  
34  
35  
36  
37  
38  
39  
40  
41  
42  
43  
44  
45  
46  
47  
48  
49  
50  
51  
52  
53  
54  
55  
56  
57  
58  
59  
60
32. Pouli N, Das Nair R, Lincoln NB, Walsh D. The experience of living with knee osteoarthritis: exploring illness and treatment beliefs through thematic analysis. *Disabil Rehabil.* 2014;36(7):600-7.
33. Hendry M, Williams NH, Markland D, Wilkinson C, Maddison P. Why should we exercise when our knees hurt? A qualitative study of primary care patients with osteoarthritis of the knee. *Fam Pract.* 2006;23(5):558-67.
34. Morden A, Jinks C, Ong BN. Lay models of self-management: how do people manage knee osteoarthritis in context? *Chronic Illness.* 2011;7(3):185-200.
35. MacKay C, Sale J, Badley EM, Jaglal SB, Davis AM. Qualitative study exploring the meaning of knee symptoms to adults ages 35-65 Years. *Arthritis Car Res.* 2016;68(3):341-7.
36. Xie F, Li SC, Fong KY, Lo NN, Yeo SJ, Yang KY, et al. What health domains and items are important to patients with knee osteoarthritis? A focus group study in a multiethnic urban Asian population. *Osteoarthritis Cartilage.* 2006;14(3):224-30.
37. Kao MH, Tsai YF. Illness experiences in middle-aged adults with early-stage knee osteoarthritis: findings from a qualitative study. *J Adv Nurs.* 2014;70(7):1564-72.
38. Al-Taiar A, Al-Sabah R, Elsalawy E, Shehab D, Al-Mahmoud S. Attitudes to knee osteoarthritis and total knee replacement in Arab women: a qualitative study. *BMC Res Notes.* 2013;6:406.
39. Man A, Davis A, Webster F, Polatajko H. Awaiting knee joint replacement surgery: An occupational perspective on the experience of osteoarthritis. *J Occupat Sci.* 2017;24(2):216-24.
40. Nyvang J, Hedstrom M, Gleissman SA. It's not just a knee, but a whole life: A qualitative descriptive study on patients' experiences of living with knee osteoarthritis and their expectations for knee arthroplasty. *Int J Qual Stud Health Well-being.* 2016;11:30193.

- 1  
2  
3  
4  
5  
6  
7  
8  
9  
10  
11  
12  
13  
14  
15  
16  
17  
18  
19  
20  
21  
22  
23  
24  
25  
26  
27  
28  
29  
30  
31  
32  
33  
34  
35  
36  
37  
38  
39  
40  
41  
42  
43  
44  
45  
46  
47  
48  
49  
50  
51  
52  
53  
54  
55  
56  
57  
58  
59  
60
41. Keysor JJ, Sparling JW, Riegger-Krugh C. The experience of knee arthritis in athletic young and middle-aged adults: an heuristic study. *Arthritis Care Res.* 1998;11(4):261-70.
  42. Hsu KY, Y.F. T, Lin YP, Liu HT. Primary family caregivers' observations and perceptions of their older relatives' knee osteoarthritis pain and pain management: a qualitative study. *J Adv Nurs.* 2015;71(9):2119-28.
  43. Figaro MK, Allegrante JP, Russo PW. Preferences for arthritis care among urban African Americans: 'I don't want to be cut'. *Health Psychol.* 2004;23(3):324-9.
  44. Alami S, Boutron I, Desjeux D, Hirschhorn M, Meric G, Rannou F, et al. Patients' and practitioners' views of knee osteoarthritis and its management: A qualitative interview study. *PLoS ONE.* 2011;6 (5):e19634.
  45. Maly MR, Krupa T. Personal experience of living with knee osteoarthritis among older adults. *Disabil Rehabil.* 2007;29(18):1423-33.
  46. Kao MH, Tsai YF. Living experiences of middle-aged adults with early knee osteoarthritis in prediagnostic phase. *Disabil Rehabil.* 2012;34(21):1827-34.
  47. Bakas T, McLennon SM, Carpenter JS, Buelow JM, Otte JL, Hanna KM, et al. Systematic review of health-related quality of life models. *Health Qual Life Out.* 2012;10(1):134.
  48. Guideline for the management of knee and hip osteoarthritis. Available from URL:<https://www.racgp.org.au/download/Documents/Guidelines/Musculoskeletal/guideline-for-the-management-of-knee-and-hip-oa-2nd-edition.pdf>: Accessed Dec 19 2018; Royal Australian College of General Practitioners, 2018.
  49. Osteoarthritis: Care and management. UK. Available from URL:<https://nice.org.uk/guidance/cg177>;: Accesed Nov 7 2018; National Institute for Health and Care Excellence, 2014.



- 1  
2  
3 50. Maher C, Underwood M, Buchbinder R. Non-specific low back pain. *Lancet*  
4 2017;389(10070):736-47.  
5  
6  
7  
8 51. Bunzli S, Watkins R, Smith A, Schütze R, O'Sullivan P. Lives on hold: a qualitative  
9 synthesis exploring the experience of chronic low-back pain. *Clin J Pain*. 2013;29(10):907-  
10 16.  
11  
12  
13 52. Darlow B, Fullen BM, Dean S, Hurley DA, Baxter GD, Dowell A. The association  
14 between health care professional attitudes and beliefs and the attitudes and beliefs, clinical  
15 management, and outcomes of patients with low back pain: A systematic review. *Eur J Pain*.  
16 2012;16(1):3-17.  
17  
18  
19 53. Darlow B, Forster BB, O'sullivan K, O'sullivan P. It is time to stop causing harm with  
20 inappropriate imaging for low back pain. *Br J Sports Med*. 2017;51(414-415).  
21  
22  
23 54. Barker KL, Reid M, Minns Lowe CJ. What does the language we use about arthritis  
24 mean to people who have osteoarthritis? A qualitative study. *Disabil Rehabil*.  
25 2014;36(5):367-72.  
26  
27  
28 55. Bunzli S, O'Brien P, Ayton D, Dowsey M, Gunn J, Choong P, et al. Misconceptions  
29 and the acceptance of evidence-based nonsurgical interventions for knee osteoarthritis. A  
30 qualitative study. *Clin Orthop Relat Res*. 2019(1-9).  
31  
32  
33 56. Gay C, Eschaliier B, Levycky C, Bonnin A, Coudeyre E. Motivators for and barriers  
34 to physical activity in people with knee osteoarthritis: A qualitative study. *Joint Bone Spine*.  
35 2018;85(4):481-6.  
36  
37  
38 57. Vratsistas-Curto A, McCluskey A, Schurr K. Use of audit, feedback and education  
39 increased guideline implementation in a multidisciplinary stroke unit. *BMJ Open Qual*.  
40 2017;6(2):e000212.  
41  
42  
43  
44  
45  
46  
47  
48  
49  
50  
51  
52  
53  
54  
55  
56  
57  
58  
59  
60

- 1  
2  
3 58. Ivers N, Jamtvedt G, Flottorp S, Young JM, Odgaard-Jensen J, French SD, et al.  
4  
5 Audit and feedback: effects on professional practice and healthcare outcomes. *Cochrane DB*  
6  
7 *Syst Rev.* 2012(7).  
8  
9  
10 59. Lawler K, Taylor NF, Shields N. Family-assisted therapy empowered families of  
11  
12 older people transitioning from hospital to the community: a qualitative study. *J Physiother.*  
13  
14 2019;65(3):166-71.  
15  
16  
17 60. Quicke JG, Foster NE, Thomas MJ, Holden MA. Is long-term physical activity safe  
18  
19 for older adults with knee pain?: a systematic review. *Osteoarthritis Cartilage.*  
20  
21 2015;23(9):1445-56.  
22  
23  
24 61. Leventhal H, Philips LA, Burns E. The common sense model of self regulation  
25  
26 (CSM): a dynamic framework for understanding illness self management. *J Behavior Med.*  
27  
28 2016;39(6):935-46.  
29  
30  
31  
32  
33  
34  
35  
36  
37  
38  
39  
40  
41  
42  
43  
44  
45  
46  
47  
48  
49  
50  
51  
52  
53  
54  
55  
56  
57  
58  
59  
60

1  
2  
3 **Figure legend**  
4

5  
6 **Figure 1: Yield of studies**  
7  
8  
9  
10  
11  
12  
13  
14  
15  
16  
17  
18  
19  
20  
21  
22  
23  
24  
25  
26  
27  
28  
29  
30  
31  
32  
33  
34  
35  
36  
37  
38  
39  
40  
41  
42  
43  
44  
45  
46  
47  
48  
49  
50  
51  
52  
53  
54  
55  
56  
57  
58  
59  
60

For peer review only

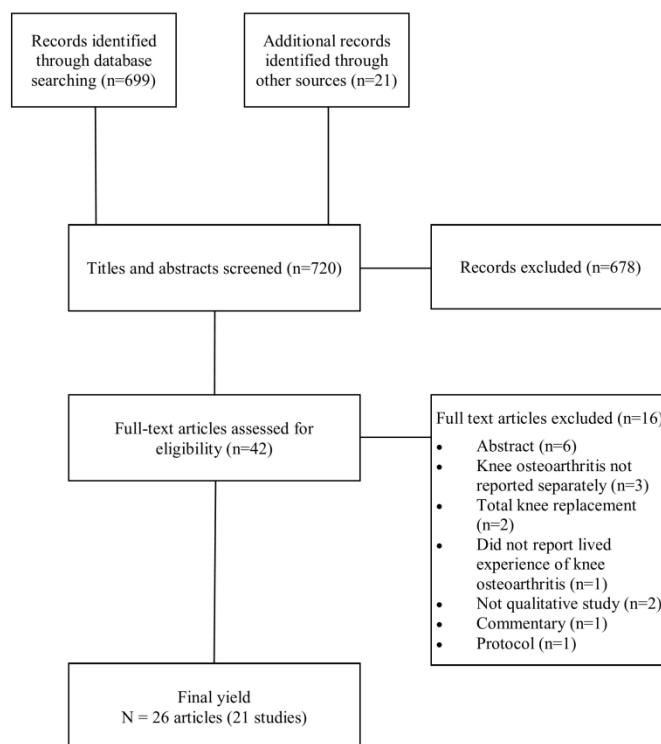

Figure1: Yield of studies

209x297mm (300 x 300 DPI)

**Appendix: Search strategy in Medline**

---

**Search**

---

1. knee osteoarthritis mp or Osteoarthritis, Knee/
  2. knee/
  3. Knee joint/
  4. (knee adj3 osteoarthritis).mp
  5. qualitative research.mp or Qualitative Research/
  6. qualitative analysis.mp
  7. qualitative evaluation.mp
  8. qualitative study.mp
  9. 1 or 2 or 3 or 4
  10. 5 or 6 or 7 or 8
  11. 9 and 10
- 

/ denotes MeSH term; mp denotes keyword

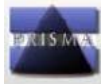

# PRISMA 2009 Checklist

1  
2  
3  
4  
5  
6  
7  
8  
9  
10  
11  
12  
13  
14  
15  
16  
17  
18  
19  
20  
21  
22  
23  
24  
25  
26  
27  
28  
29  
30  
31  
32  
33  
34  
35  
36  
37  
38  
39  
40  
41  
42  
43  
44  
45  
46  
47

| Section/topic                      | #  | Checklist item                                                                                                                                                                                                                                                                                              | Reported on page # |
|------------------------------------|----|-------------------------------------------------------------------------------------------------------------------------------------------------------------------------------------------------------------------------------------------------------------------------------------------------------------|--------------------|
| <b>TITLE</b>                       |    |                                                                                                                                                                                                                                                                                                             |                    |
| Title                              | 1  | Identify the report as a systematic review, meta-analysis, or both.                                                                                                                                                                                                                                         | 6                  |
| <b>ABSTRACT</b>                    |    |                                                                                                                                                                                                                                                                                                             |                    |
| Structured summary                 | 2  | Provide a structured summary including, as applicable: background; objectives; data sources; study eligibility criteria, participants, and interventions; study appraisal and synthesis methods; results; limitations; conclusions and implications of key findings; systematic review registration number. | 1                  |
| <b>INTRODUCTION</b>                |    |                                                                                                                                                                                                                                                                                                             |                    |
| Rationale                          | 3  | Describe the rationale for the review in the context of what is already known.                                                                                                                                                                                                                              | 4                  |
| Objectives                         | 4  | Provide an explicit statement of questions being addressed with reference to participants, interventions, comparisons, outcomes, and study design (PICOS).                                                                                                                                                  | 4                  |
| <b>METHODS</b>                     |    |                                                                                                                                                                                                                                                                                                             |                    |
| Protocol and registration          | 5  | Indicate if a review protocol exists, if and where it can be accessed (e.g., Web address), and, if available, provide registration information including registration number.                                                                                                                               | 6                  |
| Eligibility criteria               | 6  | Specify study characteristics (e.g., PICOS, length of follow-up) and report characteristics (e.g., years considered, language, publication status) used as criteria for eligibility, giving rationale.                                                                                                      | 6                  |
| Information sources                | 7  | Describe all information sources (e.g., databases with dates of coverage, contact with study authors to identify additional studies) in the search and date last searched.                                                                                                                                  | 6                  |
| Search                             | 8  | Present full electronic search strategy for at least one database, including any limits used, such that it could be repeated.                                                                                                                                                                               | 6                  |
| Study selection                    | 9  | State the process for selecting studies (i.e., screening, eligibility, included in systematic review, and, if applicable, included in the meta-analysis).                                                                                                                                                   | 6,7<br>Table 1     |
| Data collection process            | 10 | Describe method of data extraction from reports (e.g., piloted forms, independently, in duplicate) and any processes for obtaining and confirming data from investigators.                                                                                                                                  | 9                  |
| Data items                         | 11 | List and define all variables for which data were sought (e.g., PICOS, funding sources) and any assumptions and simplifications made.                                                                                                                                                                       | 9                  |
| Risk of bias in individual studies | 12 | Describe methods used for assessing risk of bias of individual studies (including specification of whether this was done at the study or outcome level), and how this information is to be used in any data synthesis.                                                                                      | 9                  |
| Summary measures                   | 13 | State the principal summary measures (e.g., risk ratio, difference in means).                                                                                                                                                                                                                               | N/A                |
| Synthesis of results               | 14 | Describe the methods of handling data and combining results of studies, if done, including measures of consistency (e.g., I <sup>2</sup> ) for each meta-analysis.                                                                                                                                          | 9                  |

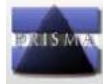

# PRISMA 2009 Checklist

Page 1 of 2

| Section/topic                 | #  | Checklist item                                                                                                                                                                                           | Reported on page # |
|-------------------------------|----|----------------------------------------------------------------------------------------------------------------------------------------------------------------------------------------------------------|--------------------|
| Risk of bias across studies   | 15 | Specify any assessment of risk of bias that may affect the cumulative evidence (e.g., publication bias, selective reporting within studies).                                                             | N/A                |
| Additional analyses           | 16 | Describe methods of additional analyses (e.g., sensitivity or subgroup analyses, meta-regression), if done, indicating which were pre-specified.                                                         | N/A                |
| <b>RESULTS</b>                |    |                                                                                                                                                                                                          |                    |
| Study selection               | 17 | Give numbers of studies screened, assessed for eligibility, and included in the review, with reasons for exclusions at each stage, ideally with a flow diagram.                                          | 10<br>Fig. 1       |
| Study characteristics         | 18 | For each study, present characteristics for which data were extracted (e.g., study size, PICOS, follow-up period) and provide the citations.                                                             | 10-14<br>Table 2   |
| Risk of bias within studies   | 19 | Present data on risk of bias of each study and, if available, any outcome level assessment (see item 12).                                                                                                | 15-16<br>Table 3   |
| Results of individual studies | 20 | For all outcomes considered (benefits or harms), present, for each study: (a) simple summary data for each intervention group (b) effect estimates and confidence intervals, ideally with a forest plot. | 17                 |
| Synthesis of results          | 21 | Present the main results of the review. If meta-analysis are done, include for each, confidence intervals and measures of consistency.                                                                   | 17-22              |
| Risk of bias across studies   | 22 | Present results of any assessment of risk of bias across studies (see Item 15).                                                                                                                          | N/A                |
| Additional analysis           | 23 | Give results of additional analyses, if done (e.g., sensitivity or subgroup analyses, meta-regression [see Item 16]).                                                                                    | N/A                |
| <b>DISCUSSION</b>             |    |                                                                                                                                                                                                          |                    |
| Summary of evidence           | 24 | Summarize the main findings including the strength of evidence for each main outcome; consider their relevance to key groups (e.g., healthcare providers, users, and policy makers).                     | 22                 |
| Limitations                   | 25 | Discuss limitations at study and outcome level (e.g., risk of bias), and at review-level (e.g., incomplete retrieval of identified research, reporting bias).                                            | 24                 |
| Conclusions                   | 26 | Provide a general interpretation of the results in the context of other evidence, and implications for future research.                                                                                  | 24                 |
| <b>FUNDING</b>                |    |                                                                                                                                                                                                          |                    |
| Funding                       | 27 | Describe sources of funding for the systematic review and other support (e.g., supply of data); role of funders for the systematic review.                                                               | 25                 |

From: Moher D, Liberati A, Tetzlaff J, Altman DG, The PRISMA Group (2009). Preferred Reporting Items for Systematic Reviews and Meta-Analyses: The PRISMA Statement. PLoS Med 6(7): e1000097. doi:10.1371/journal.pmed1000097

For more information, visit: [www.prisma-statement.org](http://www.prisma-statement.org)  
For peer review only - <http://bmjopen.bmj.com/site/about/guidelines.xhtml>

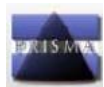

# PRISMA 2009 Checklist

For peer review only

- 1
- 2
- 3
- 4
- 5
- 6
- 7
- 8
- 9
- 10
- 11
- 12
- 13
- 14
- 15
- 16
- 17
- 18
- 19
- 20
- 21
- 22
- 23
- 24
- 25
- 26
- 27
- 28
- 29
- 30
- 31
- 32
- 33
- 34
- 35
- 36
- 37
- 38
- 39
- 40
- 41
- 42
- 43
- 44
- 45
- 46
- 47



**Checklist:** Enhancing transparency in reporting the synthesis of qualitative research (ENTREQ)

|   | Item                       | Guide and description                                                                                                                                                                                                                                                                                                                                                                                             | Evidence in manuscript                                                                                                                                                                                                                                                                      |
|---|----------------------------|-------------------------------------------------------------------------------------------------------------------------------------------------------------------------------------------------------------------------------------------------------------------------------------------------------------------------------------------------------------------------------------------------------------------|---------------------------------------------------------------------------------------------------------------------------------------------------------------------------------------------------------------------------------------------------------------------------------------------|
| 1 | Aim                        | State the research question the synthesis addresses.                                                                                                                                                                                                                                                                                                                                                              | Research question included in introduction on page 5..                                                                                                                                                                                                                                      |
| 2 | Synthesis methodology      | Identify the synthesis methodology or theoretical framework which underpins the synthesis and describe the rationale for choice of methodology ( <i>e.g. meta-ethnography, thematic synthesis, critical interpretive synthesis, grounded theory synthesis, realist synthesis, meta-aggregation, meta-study, framework synthesis</i> ).                                                                            | The theoretical framework was a thematic analysis and content analysis included in the methods section of manuscript on page 9 lines 158-63.<br>The rationale using this inductive approach to address the limitations in quantitative research was included in the introduction on page 4. |
| 3 | Approach to searching      | Indicate whether the search was pre-planned ( <i>comprehensive search strategies to seek all available studies</i> ) or iterative ( <i>to seek all available concepts until they theoretical saturation is achieved</i> ).                                                                                                                                                                                        | A pre-planned search was applied and registered on Prospero - registration number CRD42018108962<br><a href="https://www.crd.york.ac.uk/PROSPERO">https://www.crd.york.ac.uk/PROSPERO</a> .<br>Page 6.                                                                                      |
| 4 | Inclusion criteria         | Specify the inclusion/exclusion criteria ( <i>e.g. in terms of population, language, year limits, type of publication, study type</i> ).                                                                                                                                                                                                                                                                          | Eligibility criteria included in methods section, pages 6-7.                                                                                                                                                                                                                                |
| 5 | Data sources               | Describe the information sources used ( <i>e.g. electronic databases (MEDLINE, EMBASE, CINAHL, psycINFO, Econlit), grey literature databases (digital thesis, policy reports), relevant organisational websites, experts, information specialists, generic web searches (Google Scholar) hand searching, reference lists</i> ) and when the searches conducted; provide the rationale for using the data sources. | The search strategy and rationale is included in methods section of manuscript on page 6.                                                                                                                                                                                                   |
| 6 | Electronic Search strategy | Describe the literature search ( <i>e.g. provide electronic search strategies with population terms, clinical or health topic terms, experiential or social phenomena related terms, filters for qualitative research, and search limits</i> ).                                                                                                                                                                   | The search strategy was included in methods section of manuscript on page 6, lines 119-29.<br>An example of the strategy using Medline was included (appendix, page 8).                                                                                                                     |
| 7 | Study screening methods    | Describe the process of study screening and sifting ( <i>e.g. title, abstract and full text review, number of independent reviewers who screened studies</i> ).                                                                                                                                                                                                                                                   | This screening process was included in the search strategy in methods section of manuscript on page 6.                                                                                                                                                                                      |

|    | Item                    | Guide and description                                                                                                                                                                                                                                                                                                                                                                             | Evidence in manuscript                                                                                                                                                                    |
|----|-------------------------|---------------------------------------------------------------------------------------------------------------------------------------------------------------------------------------------------------------------------------------------------------------------------------------------------------------------------------------------------------------------------------------------------|-------------------------------------------------------------------------------------------------------------------------------------------------------------------------------------------|
| 8  | Study characteristics   | Present the characteristics of the included studies ( <i>e.g. year of publication, country, population, number of participants, data collection, methodology, analysis, research questions</i> ).                                                                                                                                                                                                 | The study characteristics were included in Table 2 (pages 12-14).                                                                                                                         |
| 9  | Study selection results | Identify the number of studies screened and provide reasons for study exclusion ( <i>e.g. for comprehensive searching, provide numbers of studies screened and reasons for exclusion indicated in a figure/flowchart; for iterative searching describe reasons for study exclusion and inclusion based on modifications to the research question and/or contribution to theory development</i> ). | Study selection results were included in results section of the manuscript on page 10 and Figure 1.                                                                                       |
| 10 | Rationale for appraisal | Describe the rationale and approach used to appraise the included studies or selected findings ( <i>e.g. assessment of conduct (validity and robustness), assessment of reporting (transparency), assessment of content and utility of the findings</i> ).                                                                                                                                        | We used a checklist (CASP) that is commonly applied in qualitative reviews in musculoskeletal research. This is included in the methods section on page 9..                               |
| 11 | Appraisal items         | State the tools, frameworks and criteria used to appraise the studies or selected findings ( <i>e.g. Existing tools: CASP, QARI, COREQ, Mays and Pope[25]; reviewer developed tools; describe the domains assessed: research team, study design, data analysis and interpretations, reporting</i> ).                                                                                              | The CASP checklist assesses the validity of the results, ethics, trustworthiness, clarity and value of results. This is included in the methods section on page 9..                       |
| 12 | Appraisal process       | Indicate whether the appraisal was conducted independently by more than one reviewer and if consensus was required.                                                                                                                                                                                                                                                                               | The CASP appraisal was applied independently by two reviewers, included in methods section of manuscript on page 9.                                                                       |
| 13 | Appraisal results       | Present results of the quality assessment and indicate which articles, if any, were weighted/excluded based on the assessment and give the rationale.                                                                                                                                                                                                                                             | The results of the appraisal were included in results section of manuscript on page 10, lines 174-81, and Table 3.                                                                        |
| 14 | Data extraction         | Indicate which sections of the primary studies were analysed and how were the data extracted from the primary studies? ( <i>e.g. all text under the headings "results /conclusions" were extracted electronically and entered into a computer software</i> ).                                                                                                                                     | The text used to describe themes and sub-themes in the primary studies were assigned descriptive codes using an inductive process. - Included in methods section of manuscript on page 9. |
| 15 | Software                | State the computer software used, if any.                                                                                                                                                                                                                                                                                                                                                         | The search results were downloaded into bibliographic software (Endnote Version 18), included in the methods, section of the manuscript                                                   |

|    | Item                 | Guide and description                                                                                                                                                                                                                  | Evidence in manuscript                                                                                                                                                                                                                                                                                                              |
|----|----------------------|----------------------------------------------------------------------------------------------------------------------------------------------------------------------------------------------------------------------------------------|-------------------------------------------------------------------------------------------------------------------------------------------------------------------------------------------------------------------------------------------------------------------------------------------------------------------------------------|
|    |                      |                                                                                                                                                                                                                                        | on page 6..                                                                                                                                                                                                                                                                                                                         |
| 16 | Number of reviewers  | Identify who was involved in coding and analysis.                                                                                                                                                                                      | Included the data analysis section of the methods on page 9..                                                                                                                                                                                                                                                                       |
| 17 | Coding               | Describe the process for coding of data ( <i>e.g. line by line coding to search for concepts</i> ).                                                                                                                                    | The coding process was included the data analysis section of the methods on page 9.                                                                                                                                                                                                                                                 |
| 18 | Study comparison     | Describe how were comparisons made within and across studies ( <i>e.g. subsequent studies were coded into pre-existing concepts, and new concepts were created when deemed necessary</i> ).                                            | A content analysis approach enabled comparison within and across studies, included in the data analysis section of the methods on page 9..                                                                                                                                                                                          |
| 19 | Derivation of themes | Explain whether the process of deriving the themes or constructs was inductive or deductive.                                                                                                                                           | An inductive process was used and reported in the data analysis section in the methods, page 9..                                                                                                                                                                                                                                    |
| 20 | Quotations           | Provide quotations from the primary studies to illustrate themes/constructs and identify whether the quotations were participant quotations of the author's interpretation.                                                            | Included in the results section of the manuscript.<br>An example of a quotation included for theme one was 'a progressive degenerative disease' on page 17..                                                                                                                                                                        |
| 21 | Synthesis output     | Present rich, compelling and useful results that go beyond a summary of the primary studies ( <i>e.g. new interpretation, models of evidence, conceptual models, analytical framework, development of a new theory or construct</i> ). | Included in the discussion section of the manuscript e.g. "The psychosocial impact of knee osteoarthritis emerged as the key factor in the lived experience of people with knee osteoarthritis."<br>Previous systematic review analyses have not focused on the psychological and social impact of living with knee osteoarthritis. |
