# Supplementary material for: Experience of living with knee osteoarthritis: a systematic review of qualitative studies
Source: PubMed Central journal article supplement — BMJ Open. 2019 Sep 24;9(9):e030060. doi: 10.1136/bmjopen-2019-030060 (PMC6773287; doi:10.1136/bmjopen-2019-030060), 2019-09-24
Supplement: bmjopen-2019-030060supp001.pdf [file bmjopen-2019-030060supp001.pdf]

**Appendix:** Search strategy in Medline

---

**Search**

---

1. knee osteoarthritis mp or Osteoarthritis, Knee/
  2. knee/
  3. Knee joint/
  4. (knee adj3 osteoarthritis).mp
  5. qualitative research.mp or Qualitative Research/
  6. qualitative analysis.mp
  7. qualitative evaluation.mp
  8. qualitative study.mp
  9. 1 or 2 or 3 or 4
  10. 5 or 6 or 7 or 8
  11. 9 and 10
- 

/ denotes MeSH term; mp denotes keyword
